# Supplementary material
Source: ML conference proceedings conference paper supplement (https://openreview.net/forum?id=QbCHlIqbDJ)

mexico KNN ( $\lambda = 0.03$ )

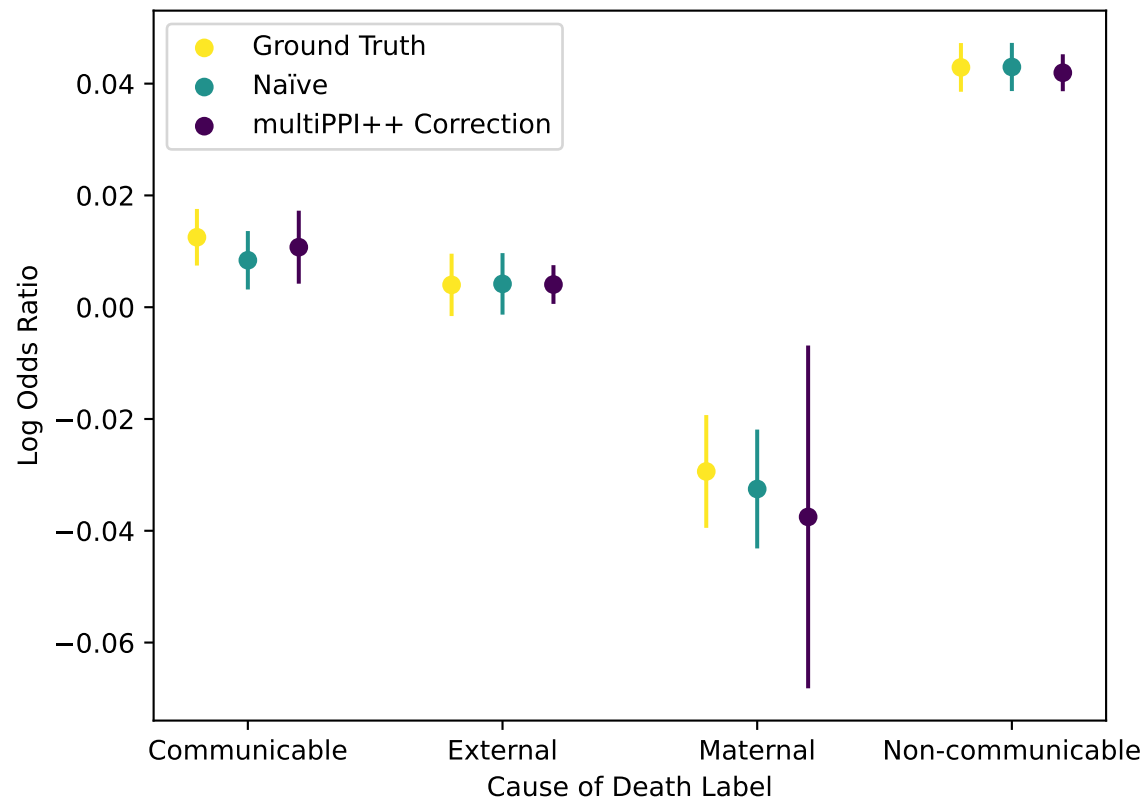

mexico SVM ( $\lambda = 0.04$ )

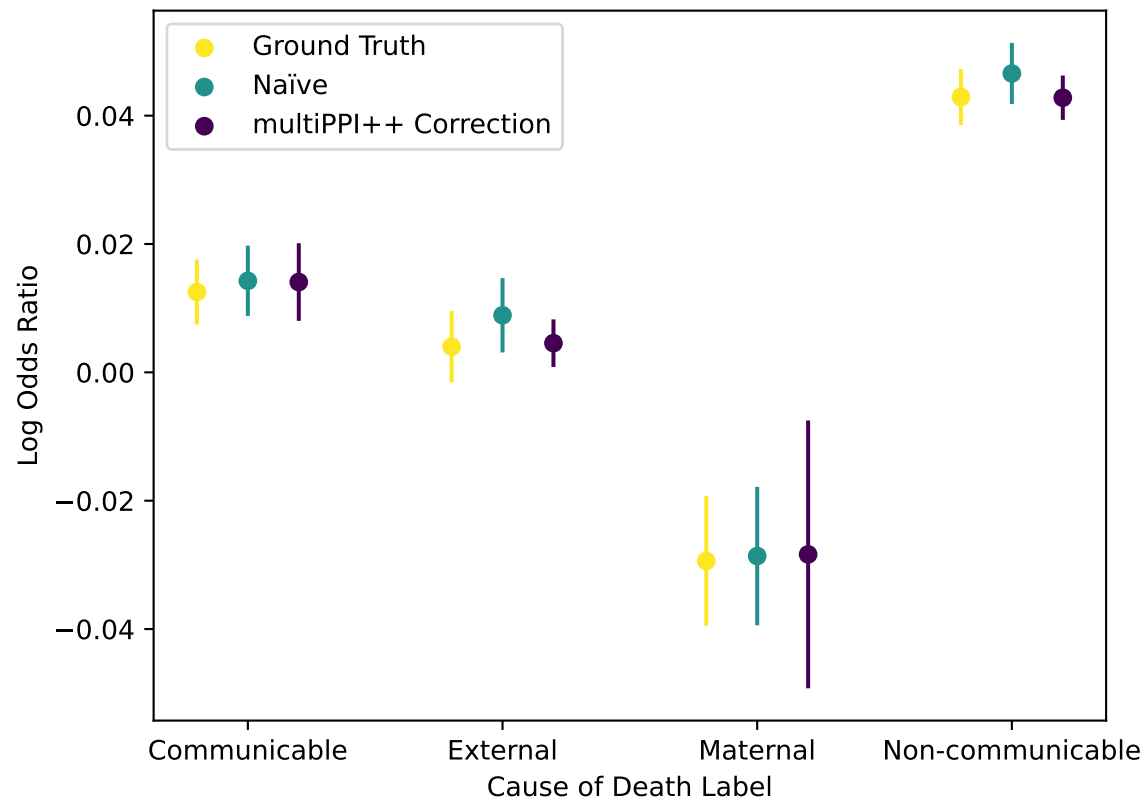

mexico NB ( $\lambda = 0.07$ )

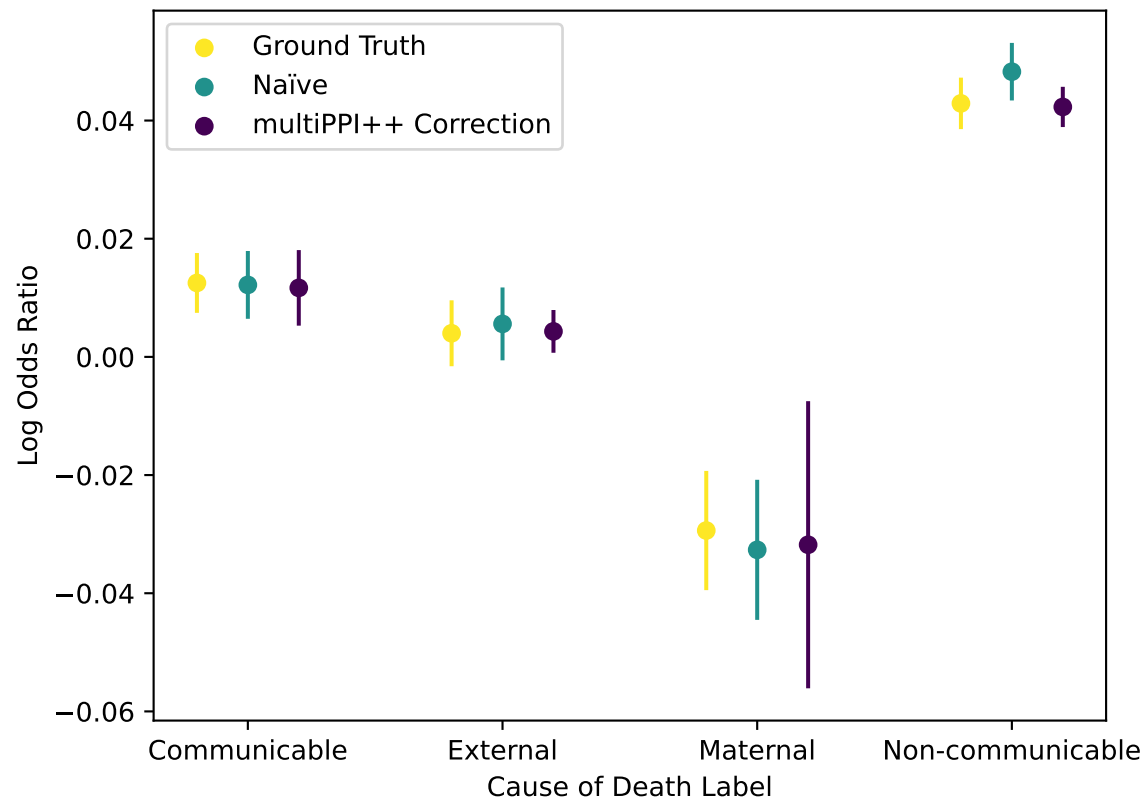

mexico bert ( $\lambda = 0.01$ )

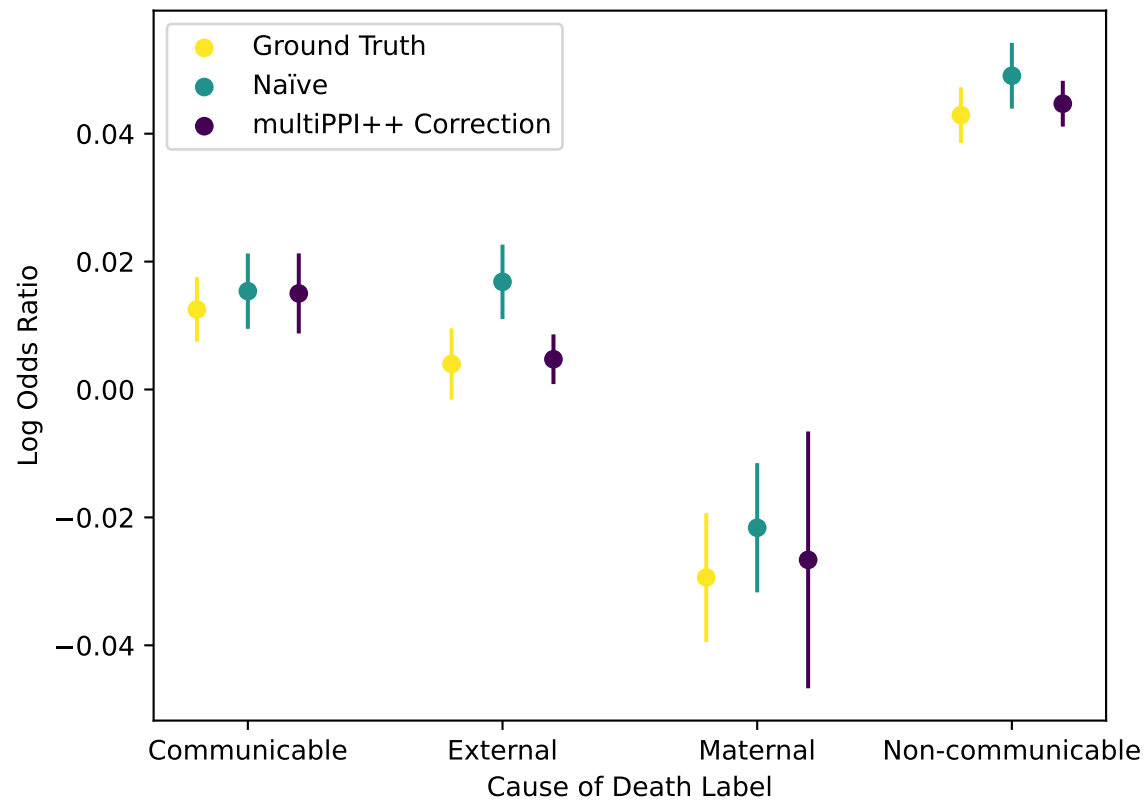

mexico gpt4\_zs ( $\lambda = 0.14$ )

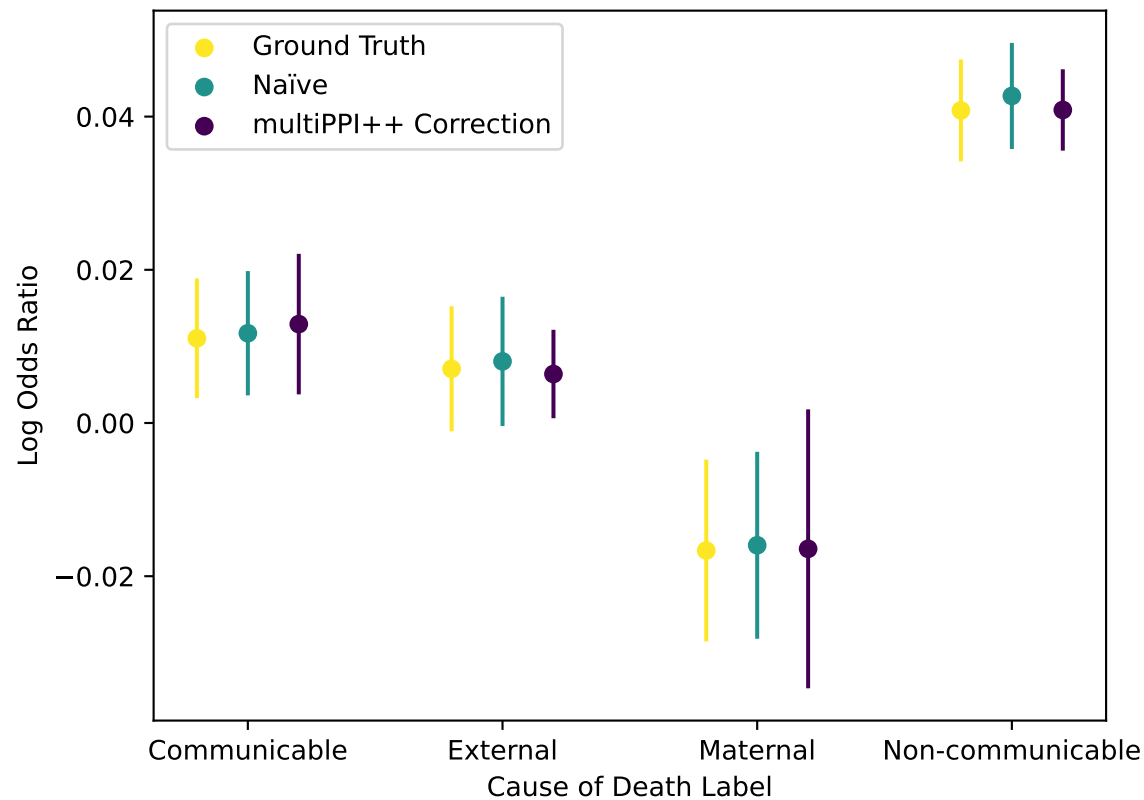

ap KNN ( $\lambda = 0.14$ )

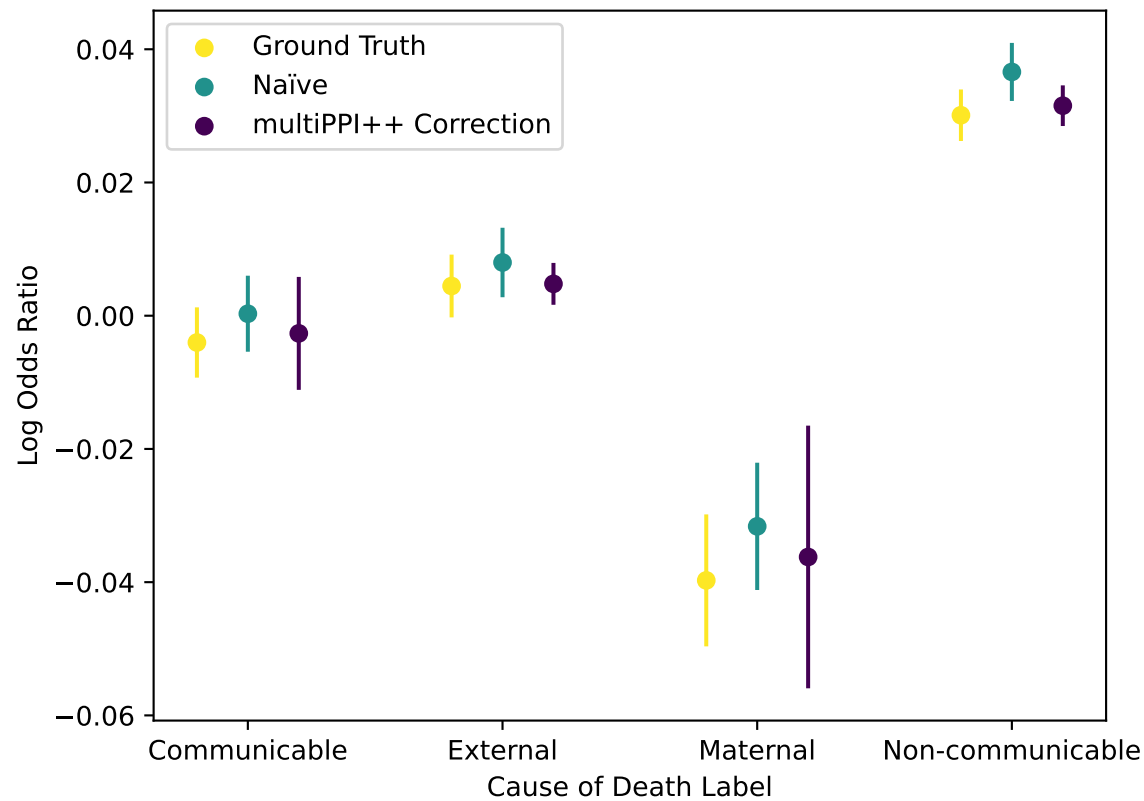

ap SVM ( $\lambda = 0.14$ )

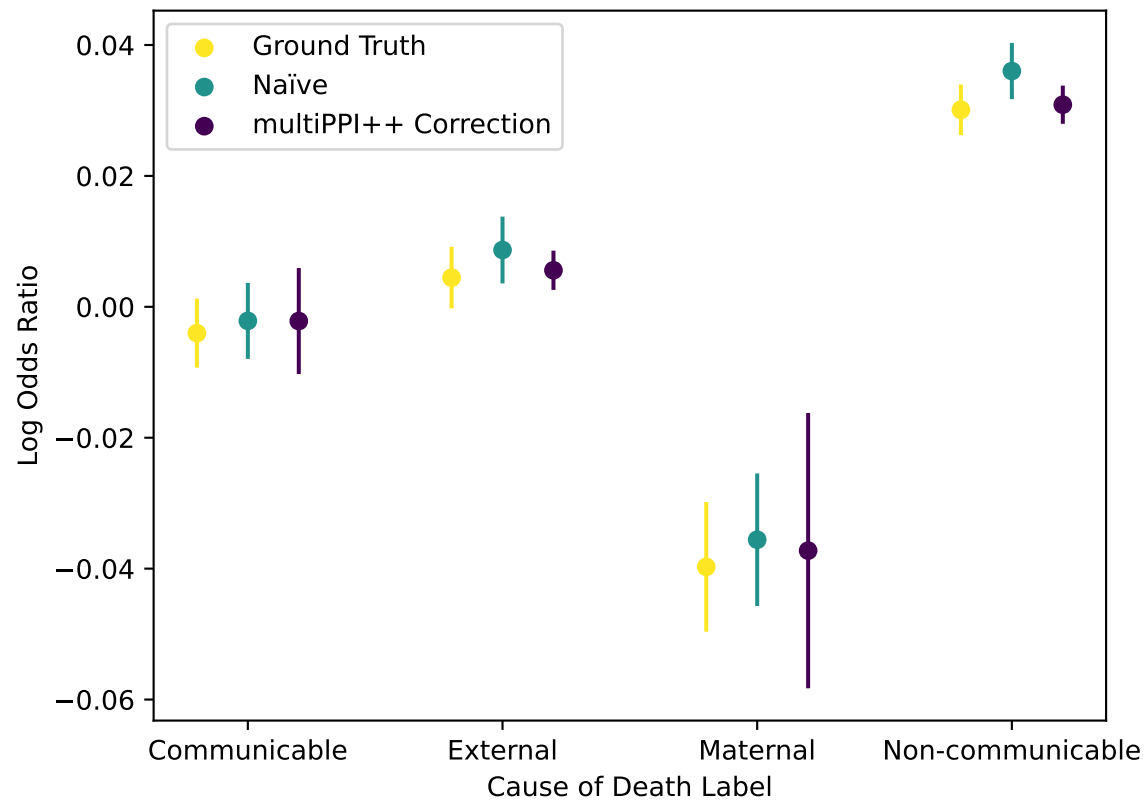

ap NB ( $\lambda = 0.18$ )

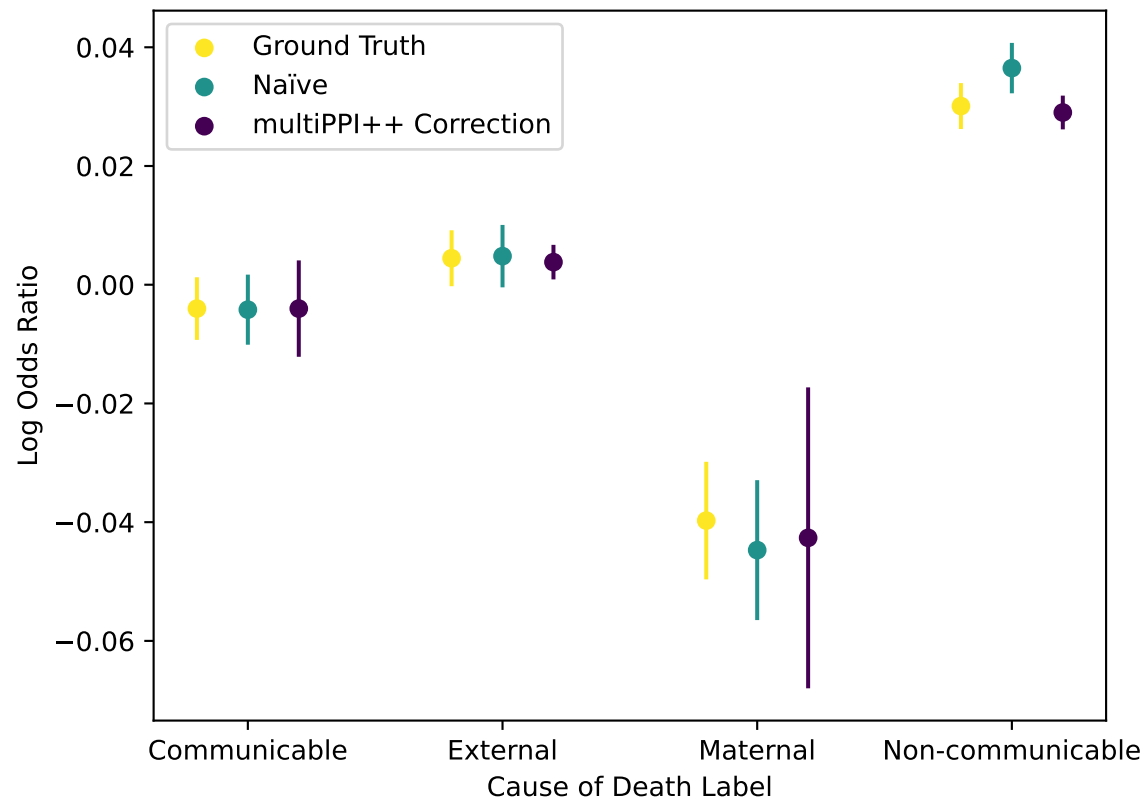



ap gpt4\_zs ( $\lambda = 0.14$ )

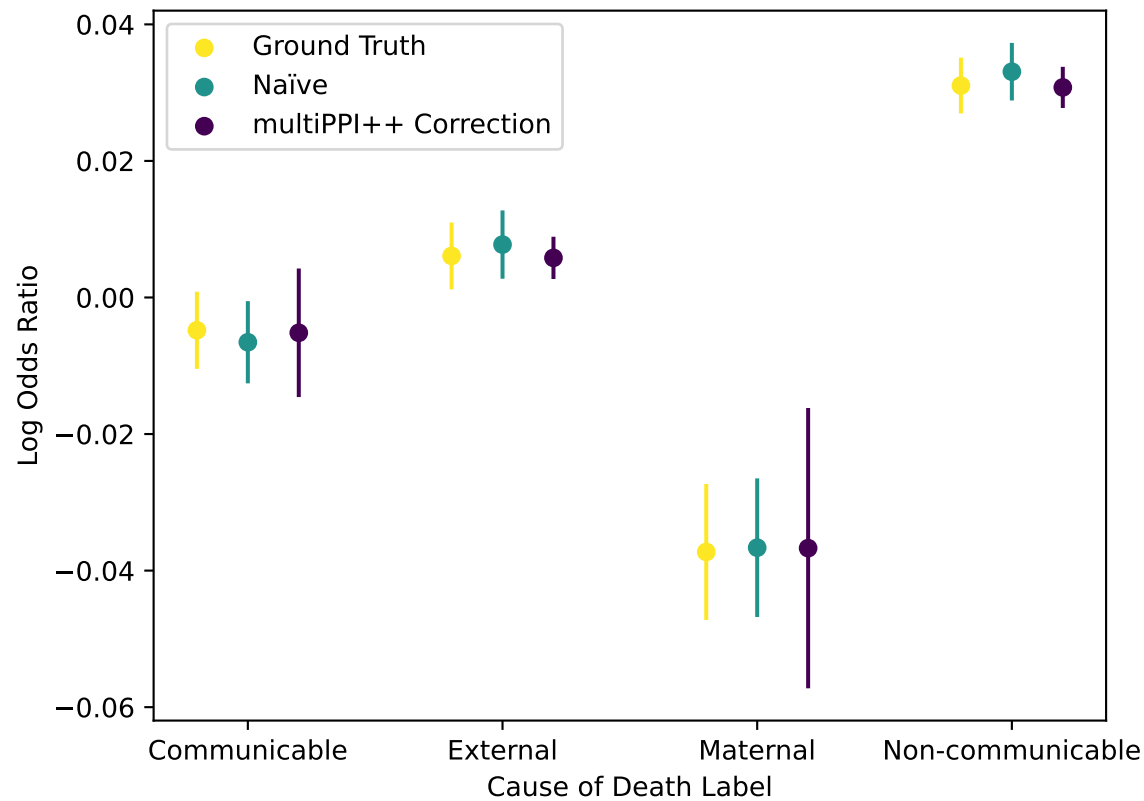

up KNN ( $\lambda = 0.05$ )

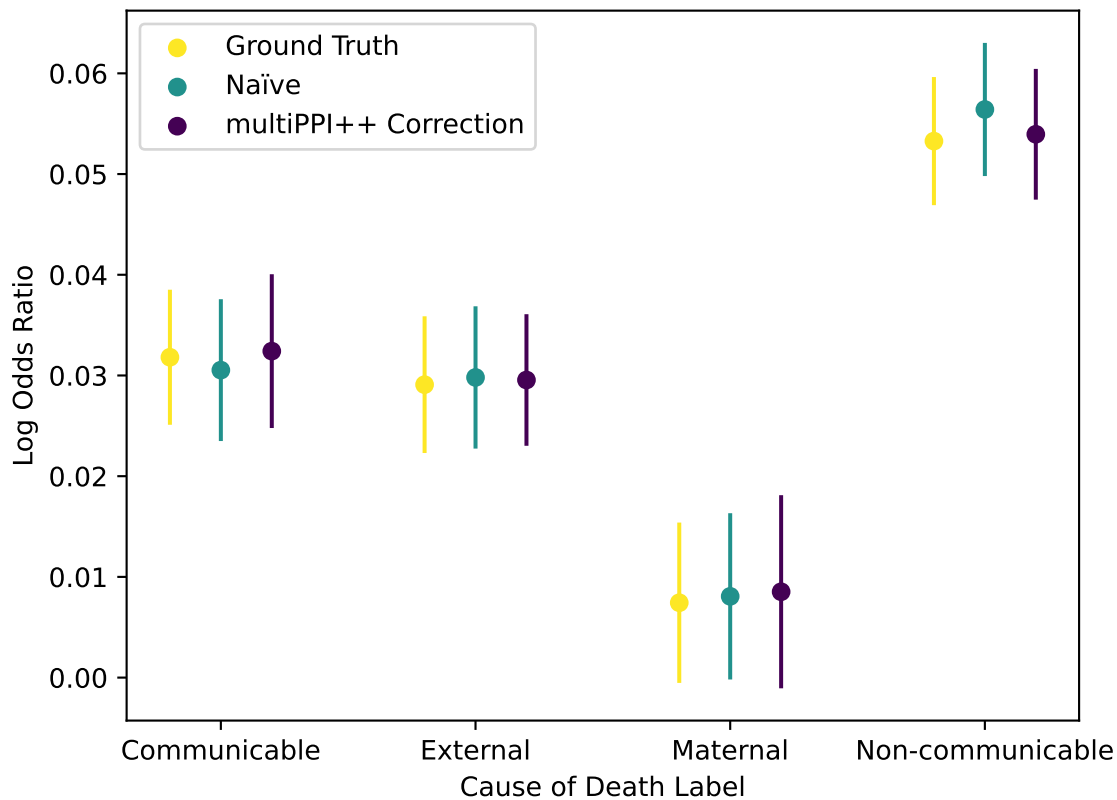

up SVM ( $\lambda = 0.14$ )

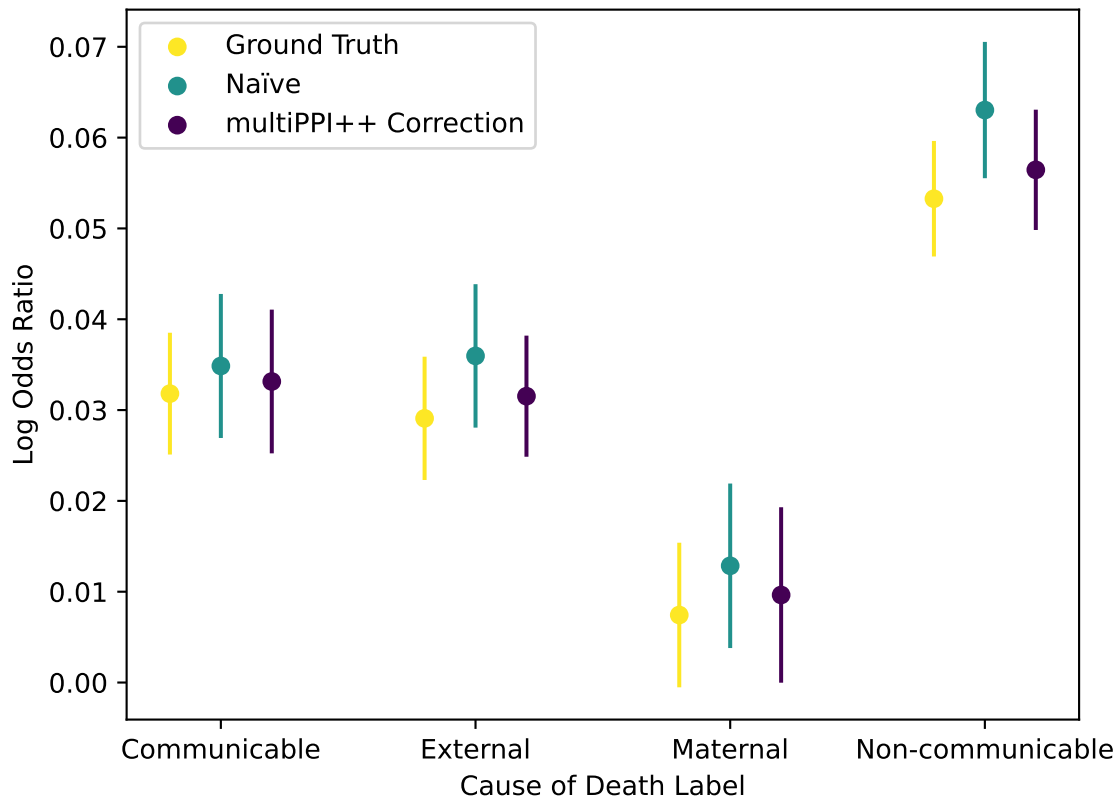

up NB ( $\lambda = 0.18$ )

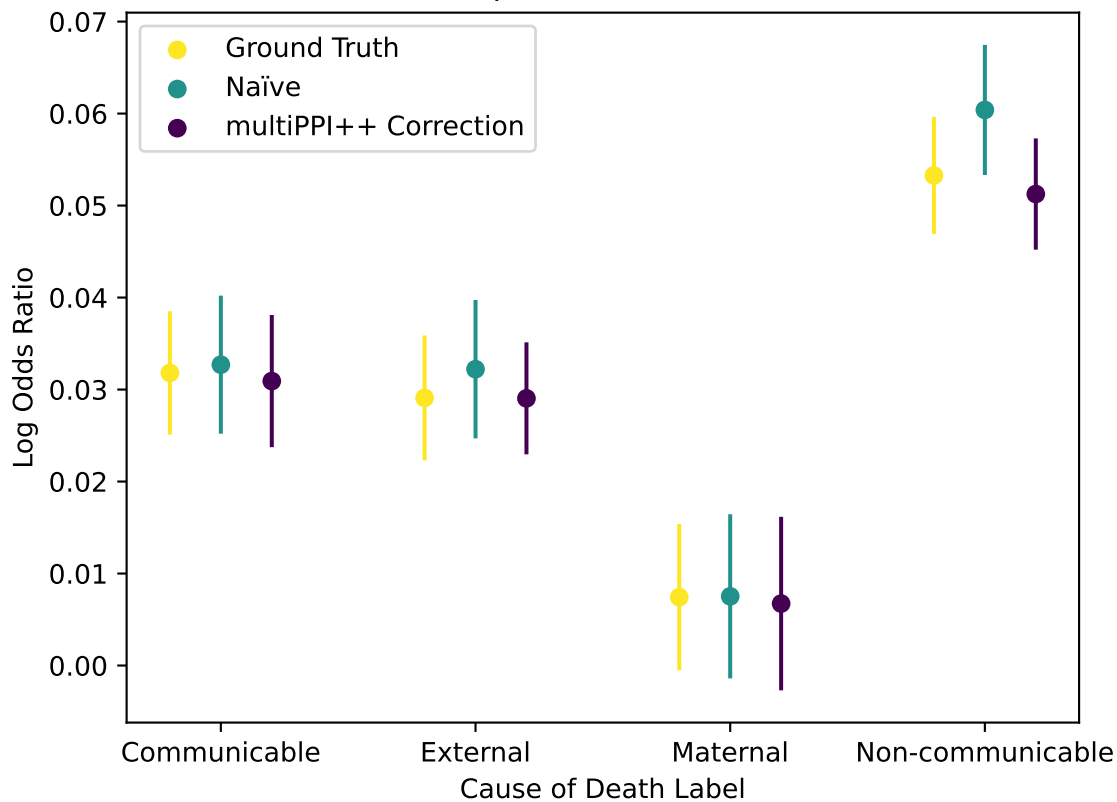

up gpt4\_zs ( $\lambda = 0.15$ )

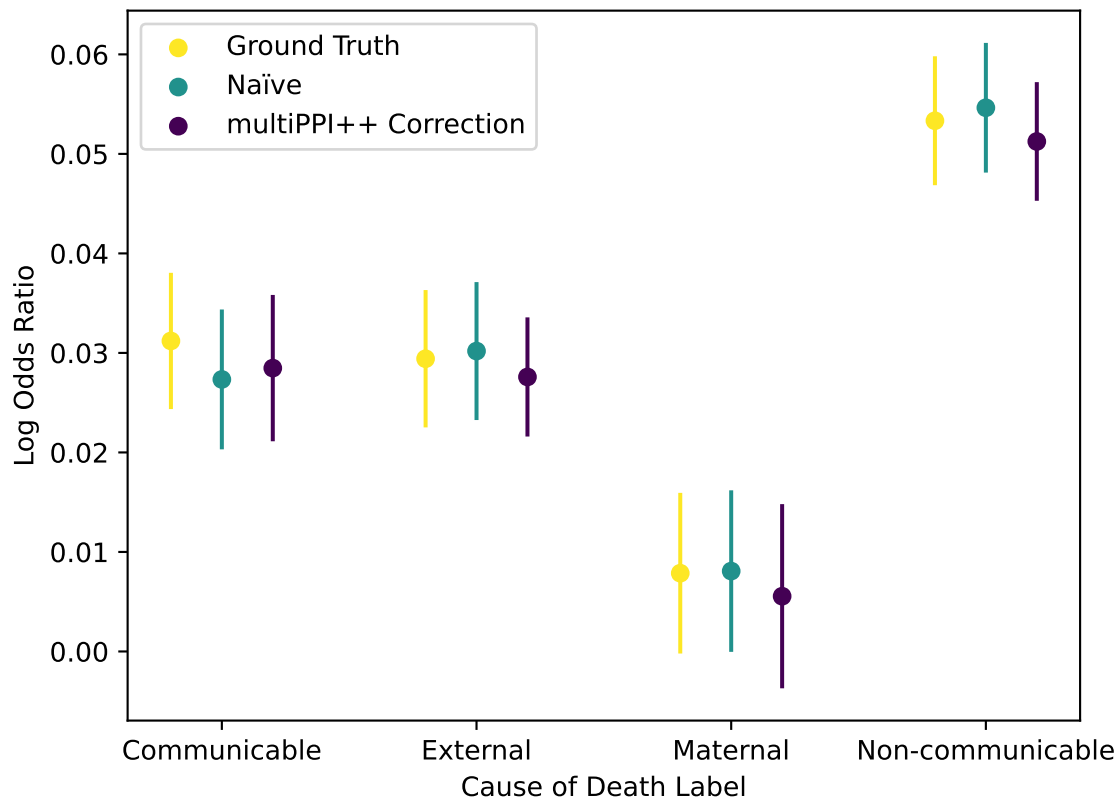

dar KNN ( $\lambda = 0.12$ )

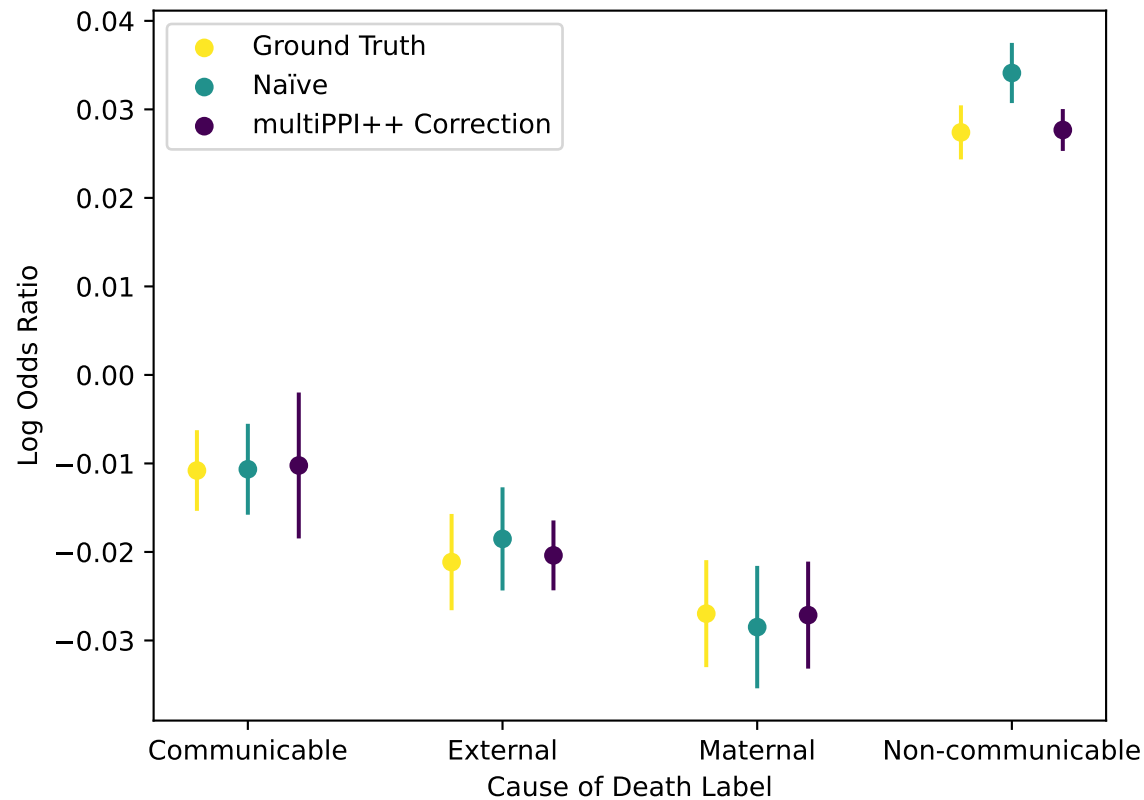

dar SVM ( $\lambda = 0.15$ )

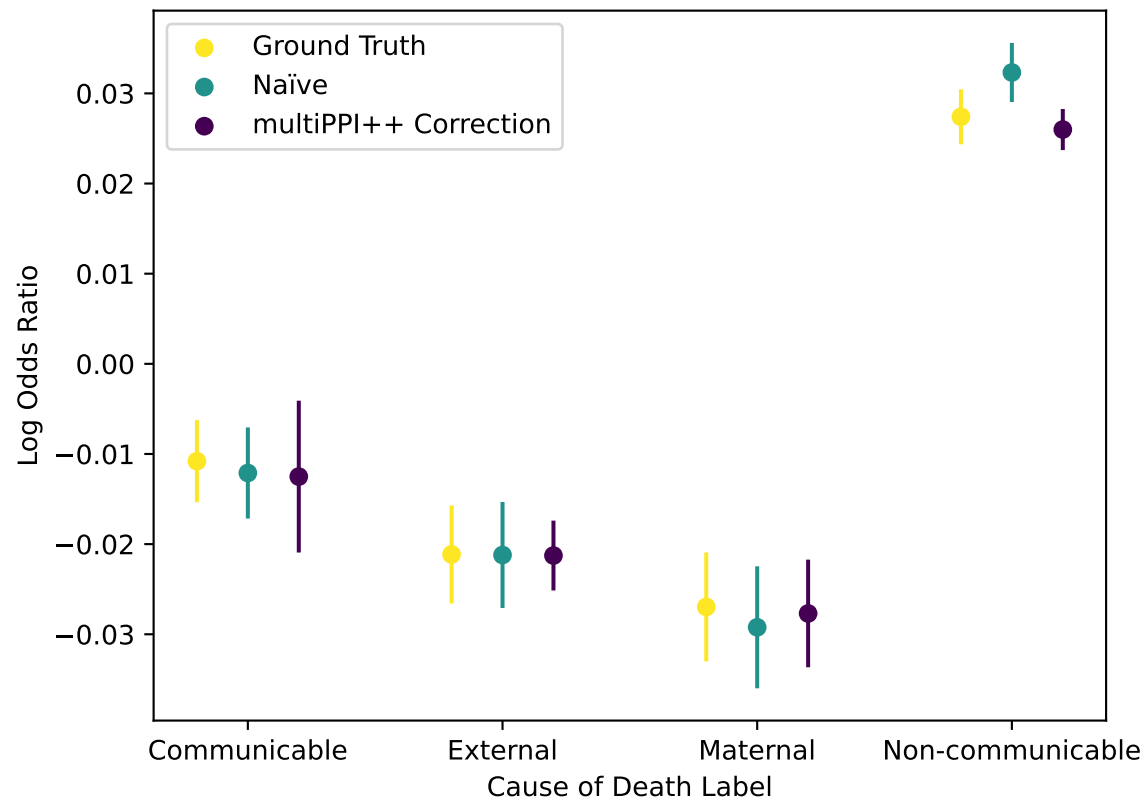

dar NB ( $\lambda = 0.2$ )

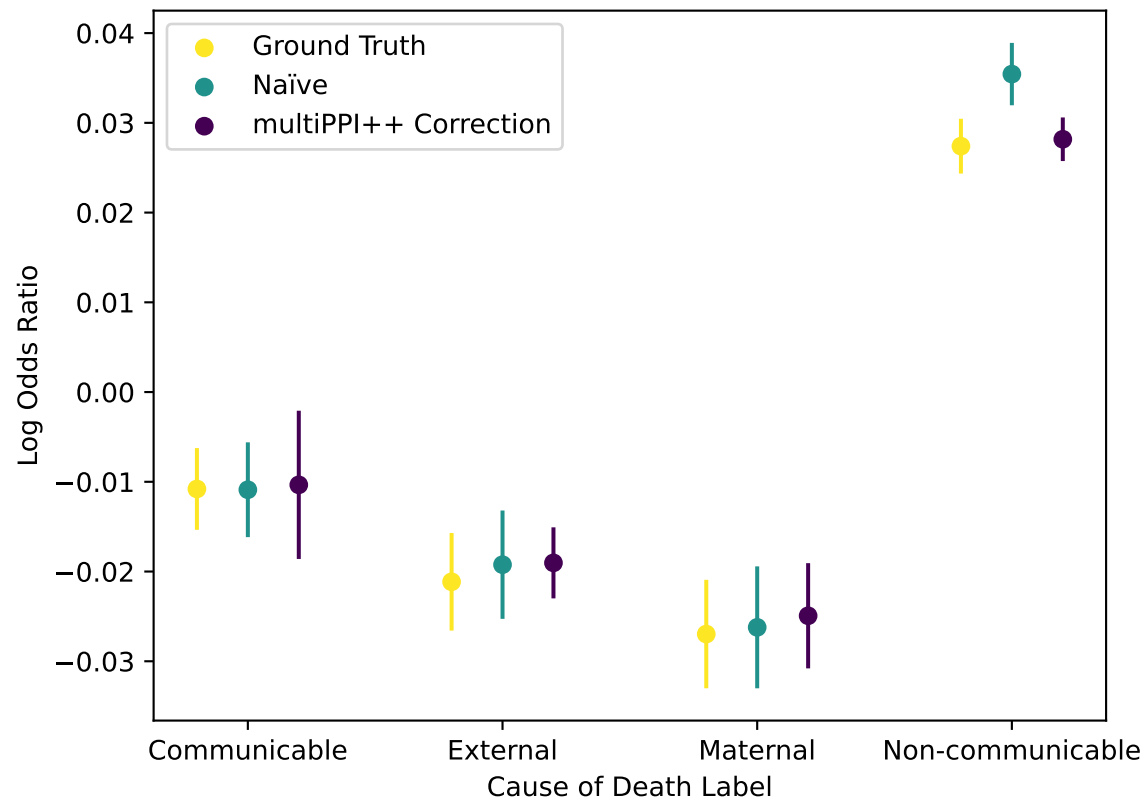



dar gpt4\_zs ( $\lambda = 0.14$ )

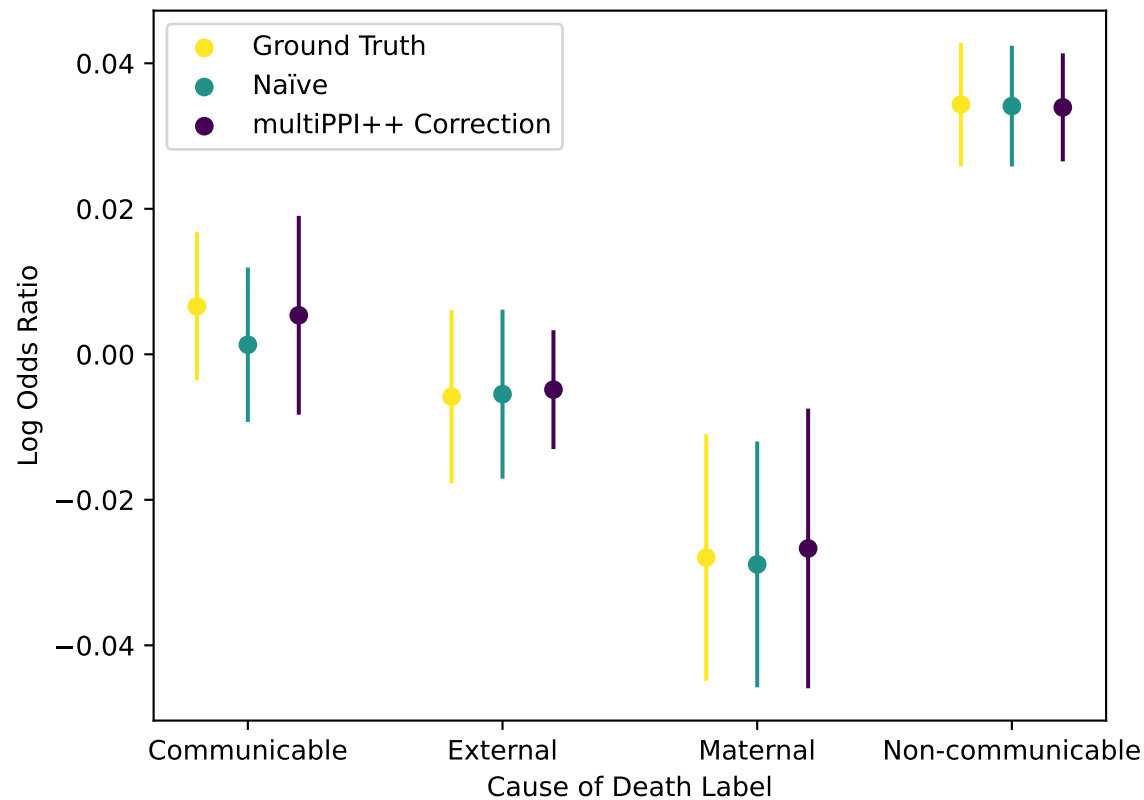

bohol KNN ( $\lambda = 0.04$ )

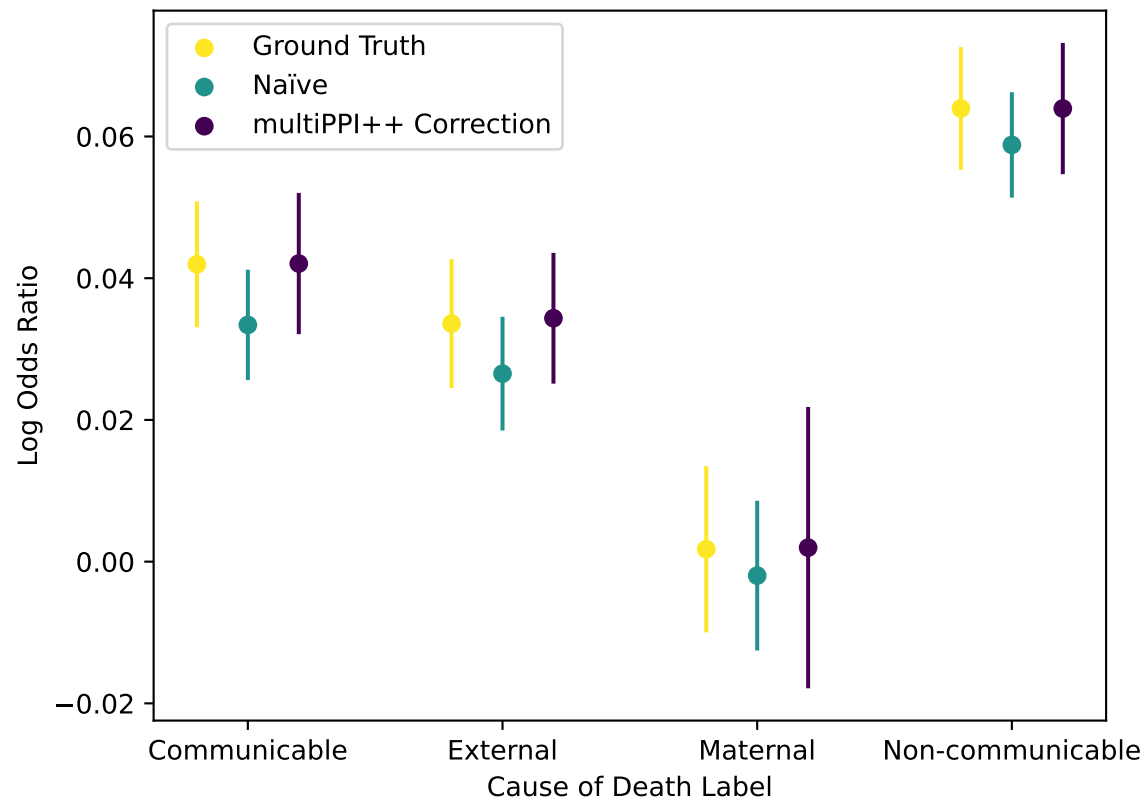

bohol SVM ( $\lambda = 0.08$ )

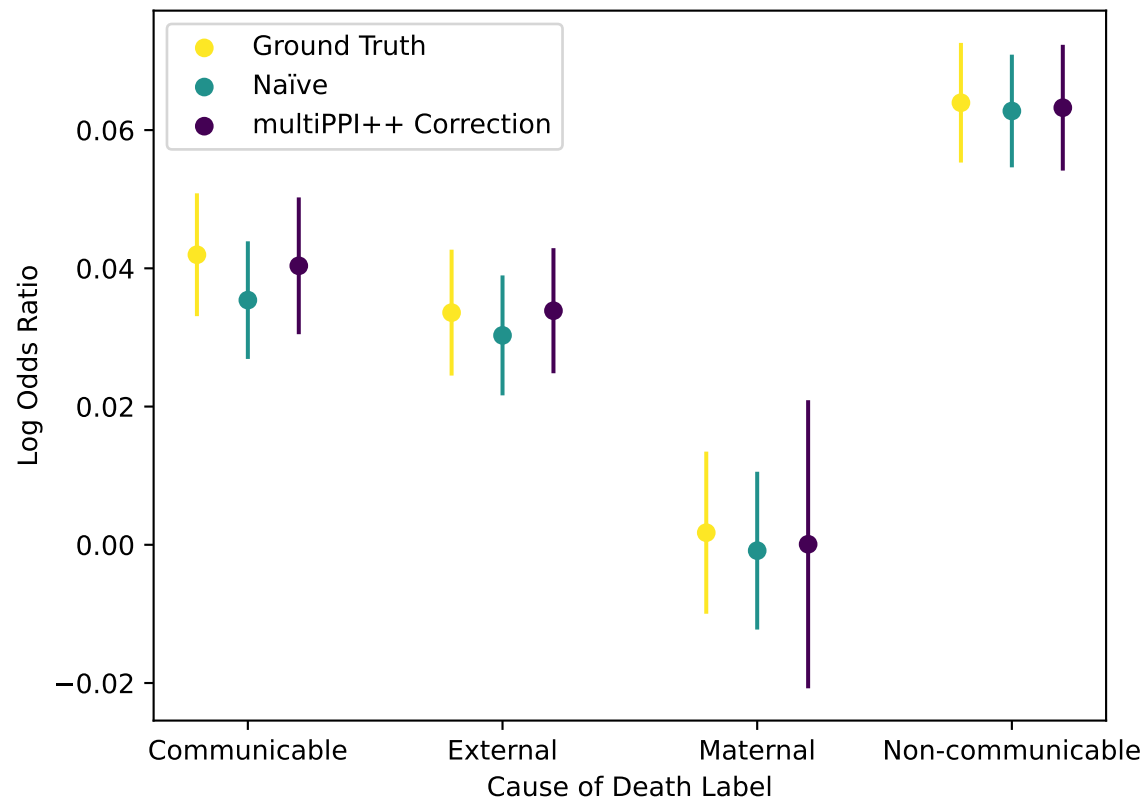

bohol NB ( $\lambda = 0.14$ )

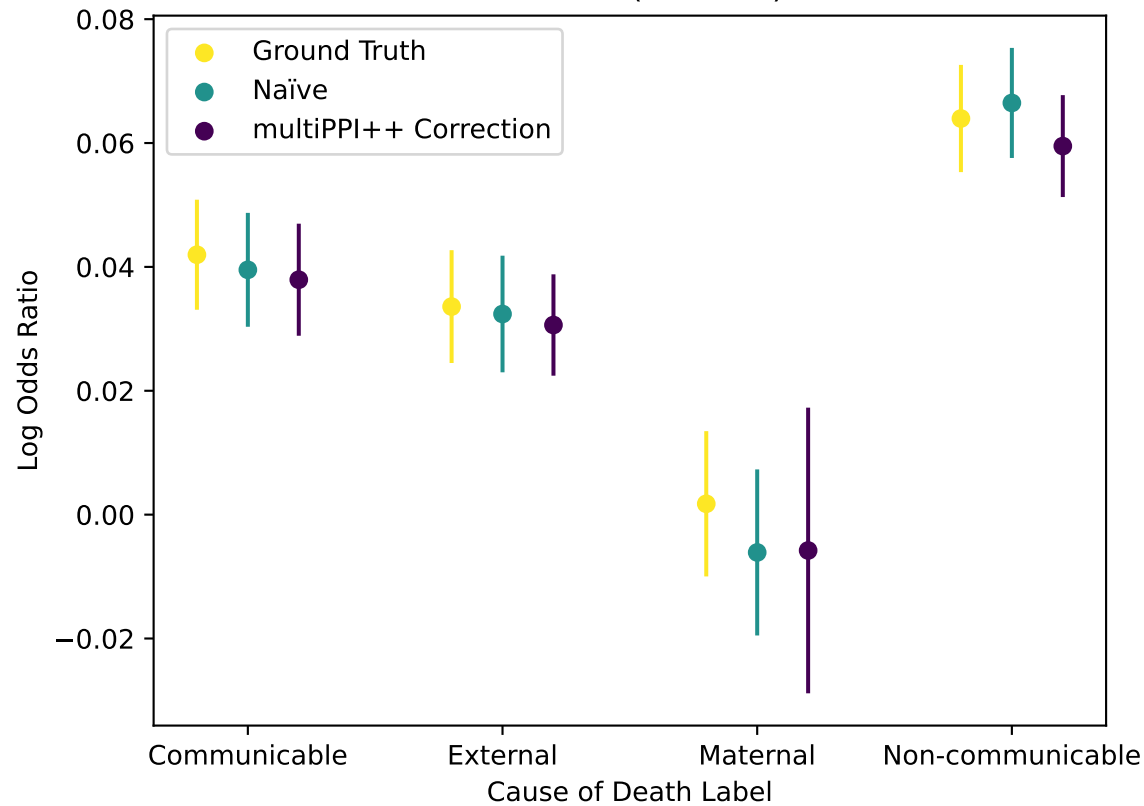

bohol gpt4\_zs ( $\lambda = 0.13$ )

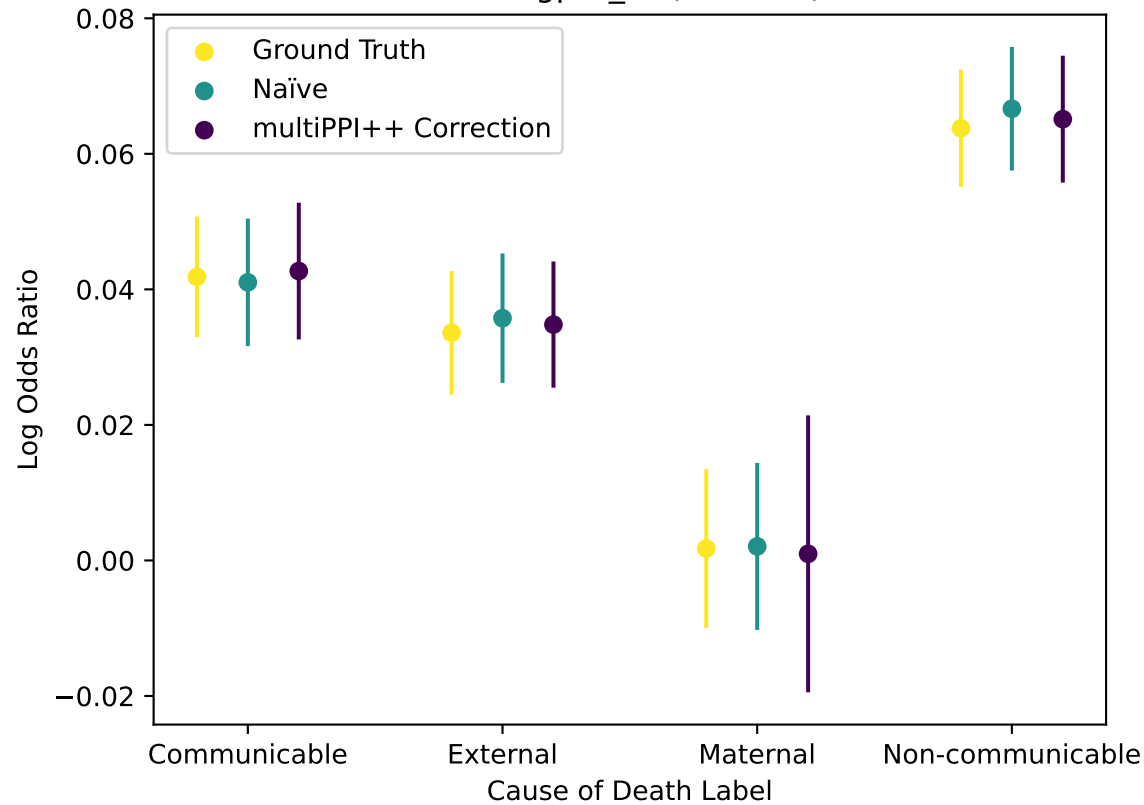

pemba KNN ( $\lambda = 0.04$ )

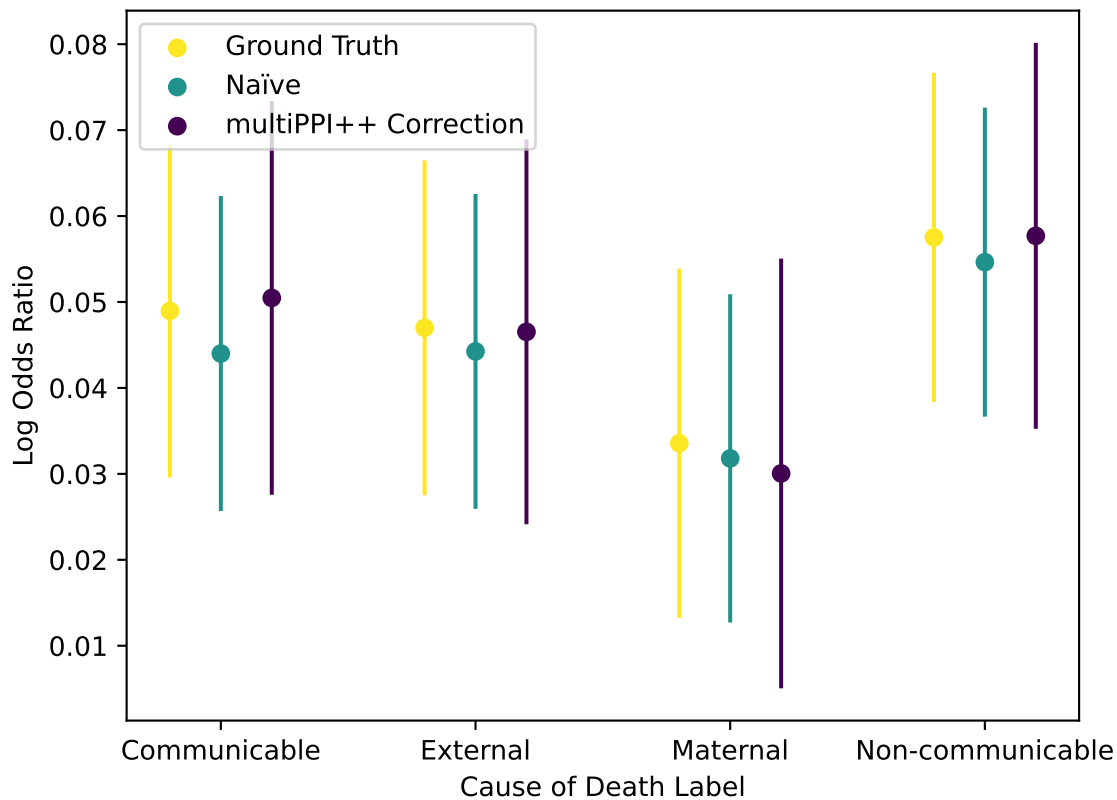

pemba SVM ( $\lambda = 0.12$ )

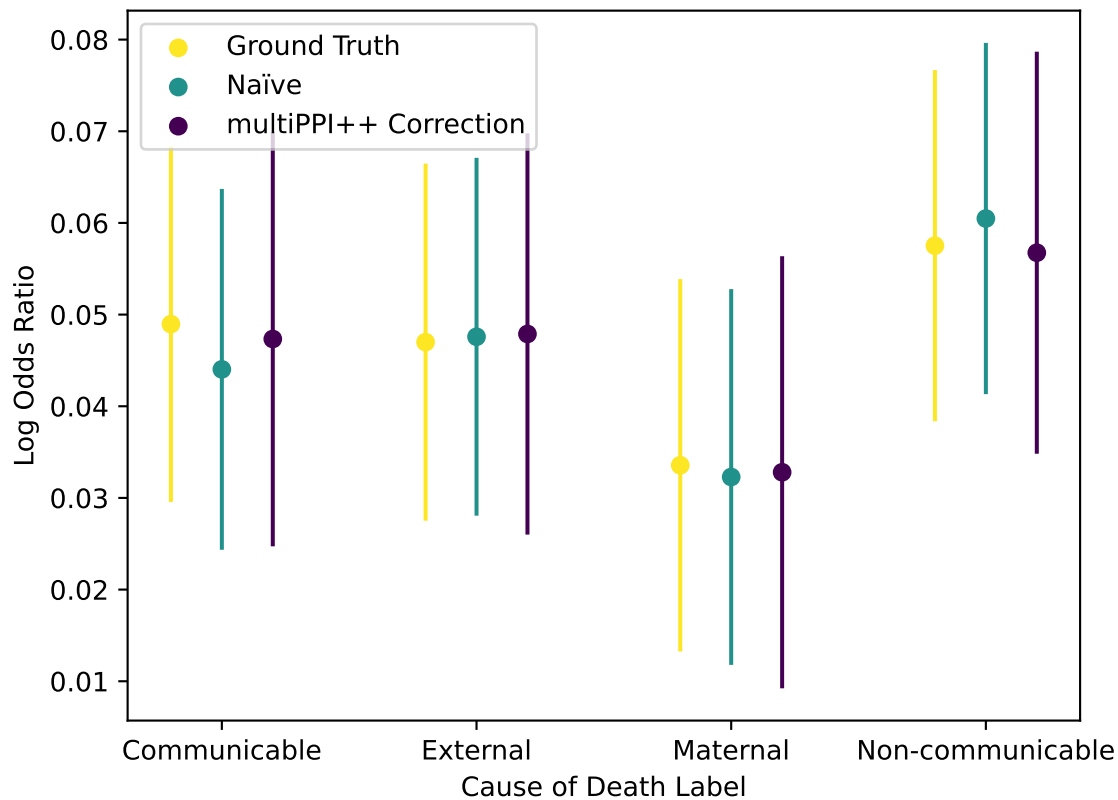

pemba NB ( $\lambda = 0.22$ )

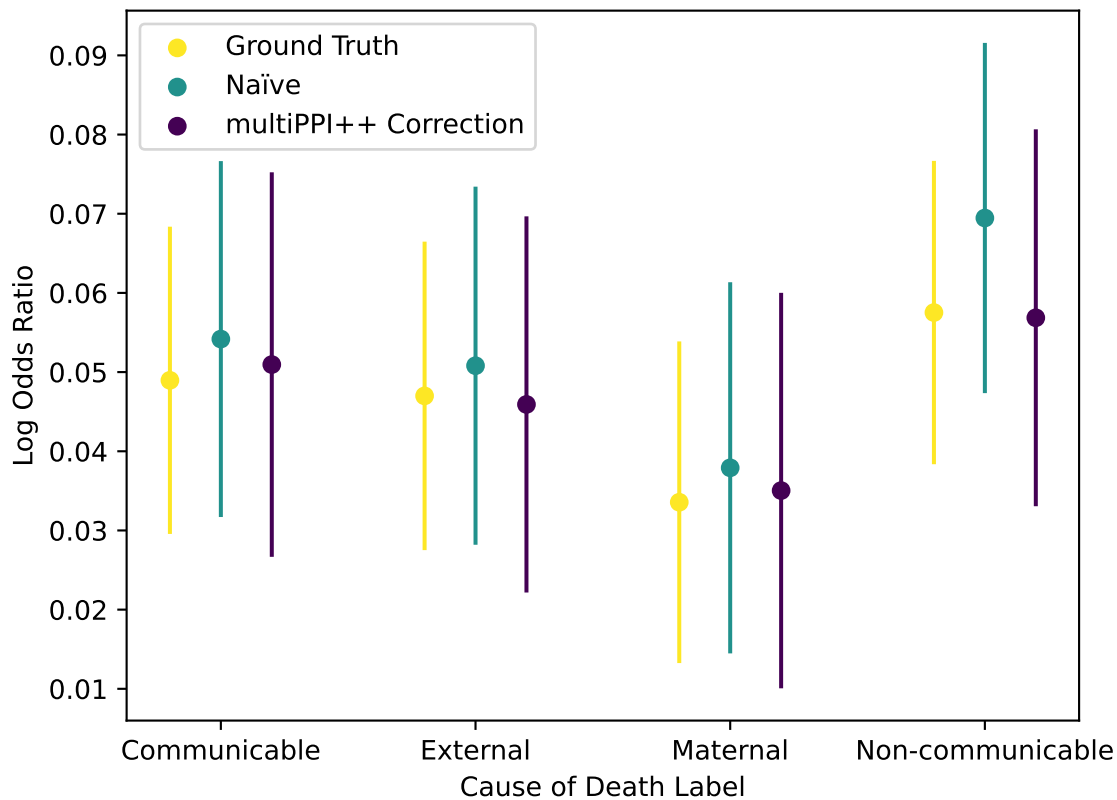



pemba bert ( $\lambda = 0.18$ )

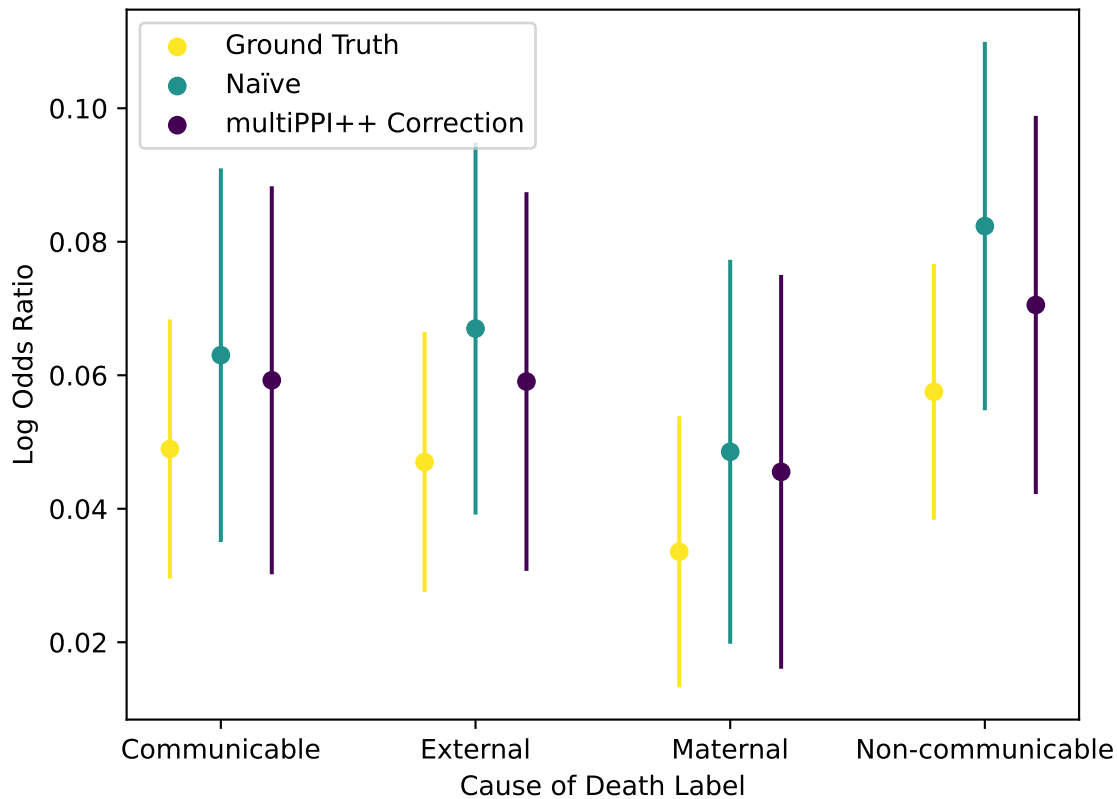

pemba gpt4\_zs ( $\lambda = 0.11$ )

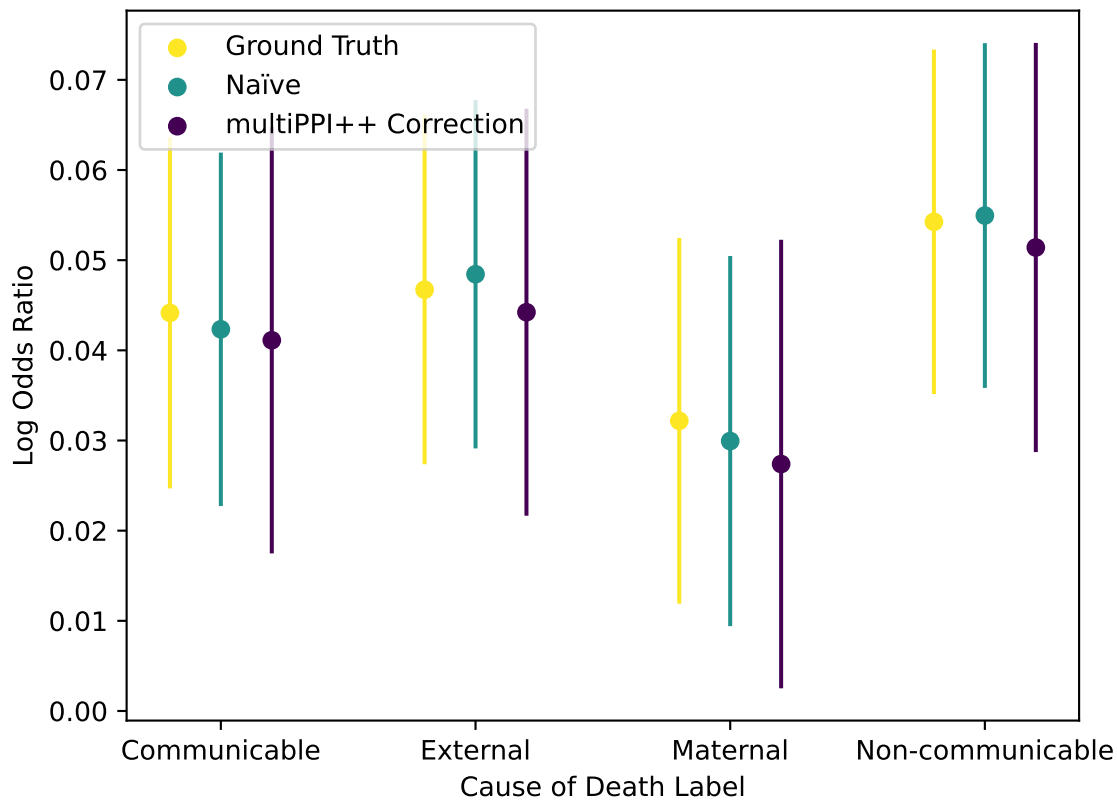

Supplement: supplementary_material [file attachment]
