# Supplementary material
Source: ML conference proceedings conference paper supplement (https://openreview.net/forum?id=QbCHlIqbDJ)

## mexico KNN

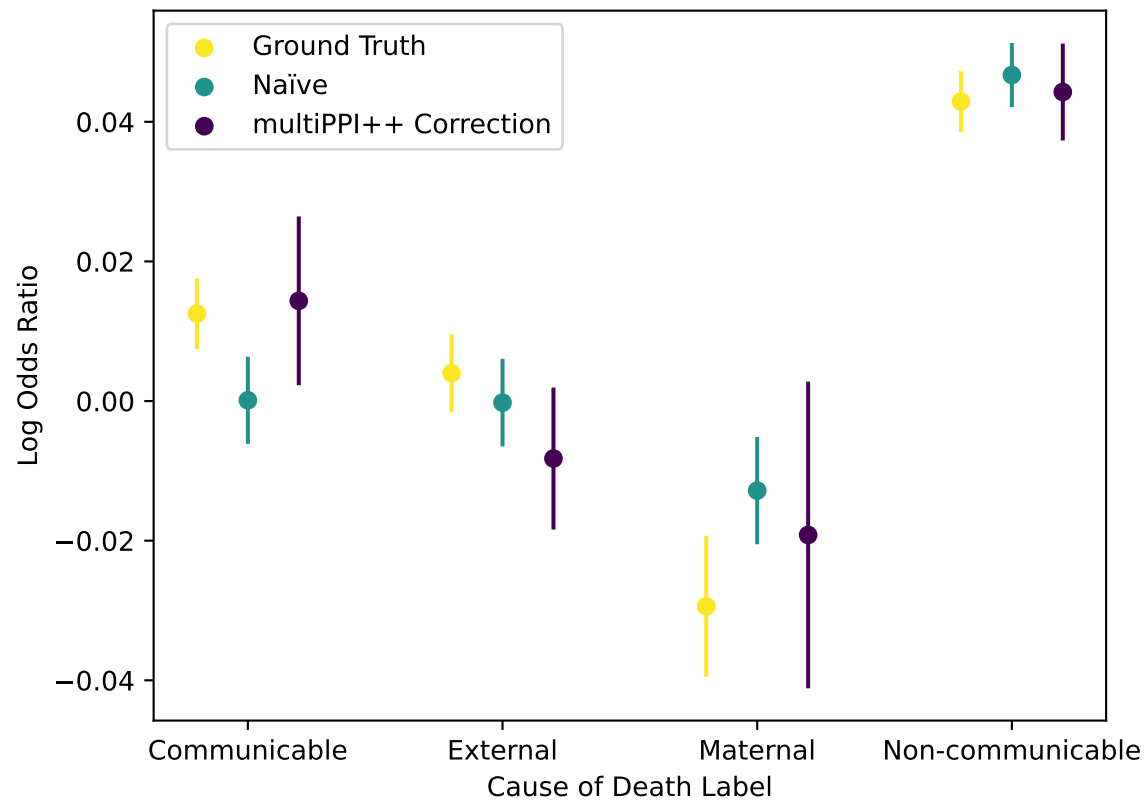

# mexico NB

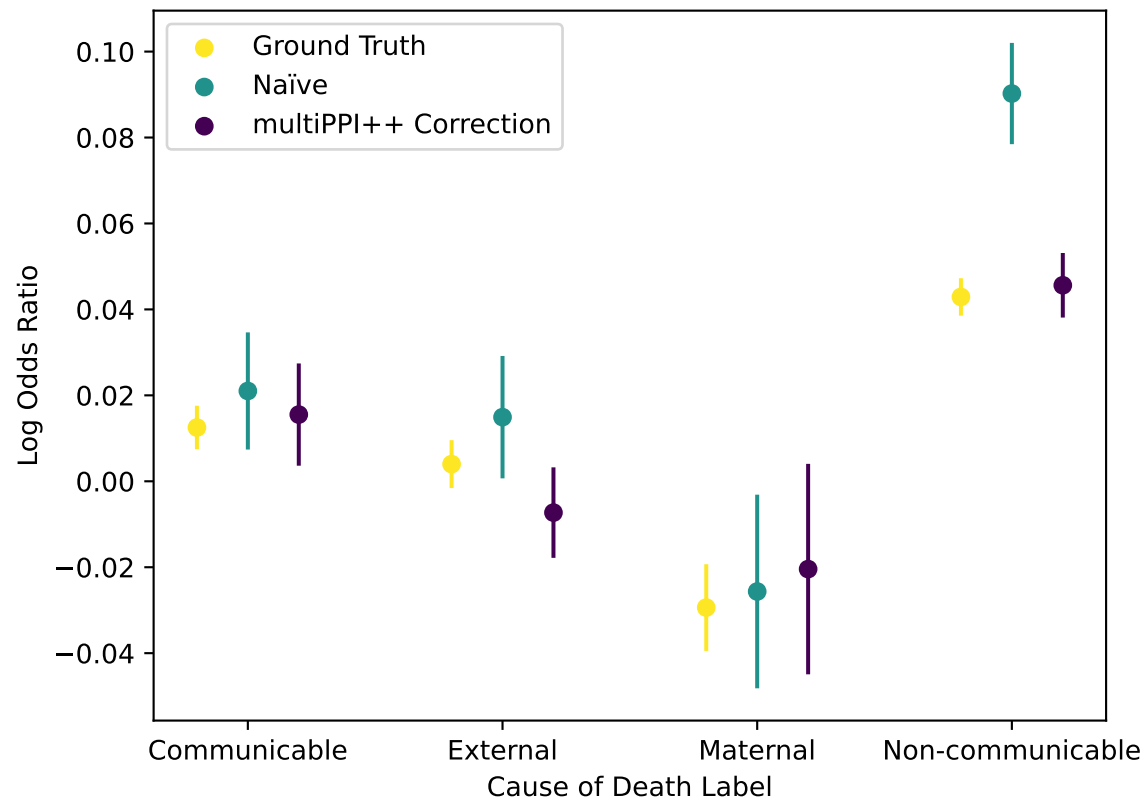

mexico bert

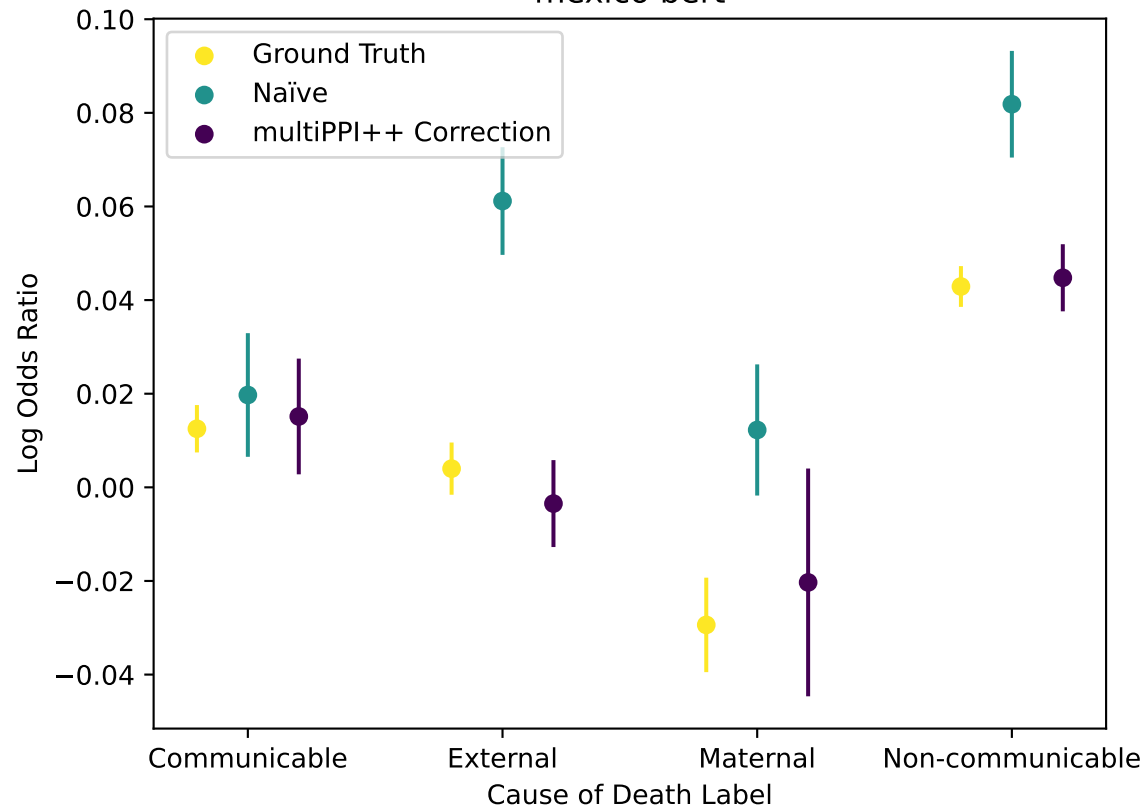

mexico gpt4\_zs

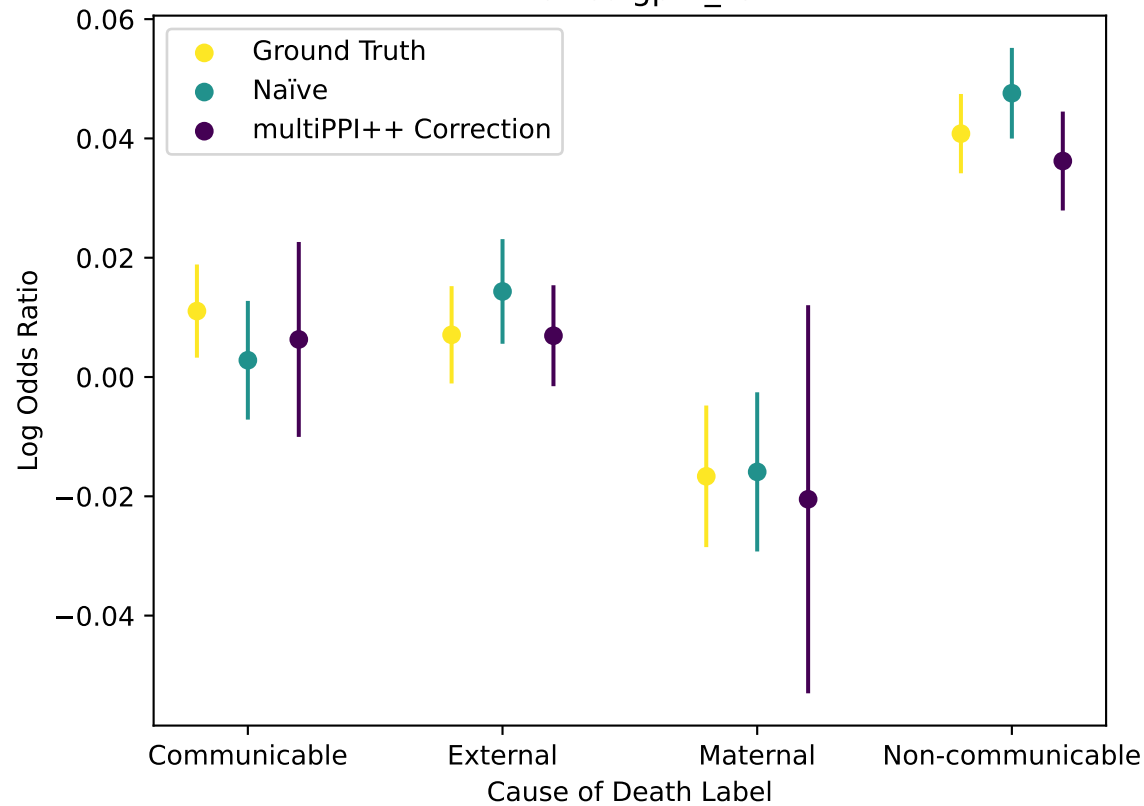

ap KNN

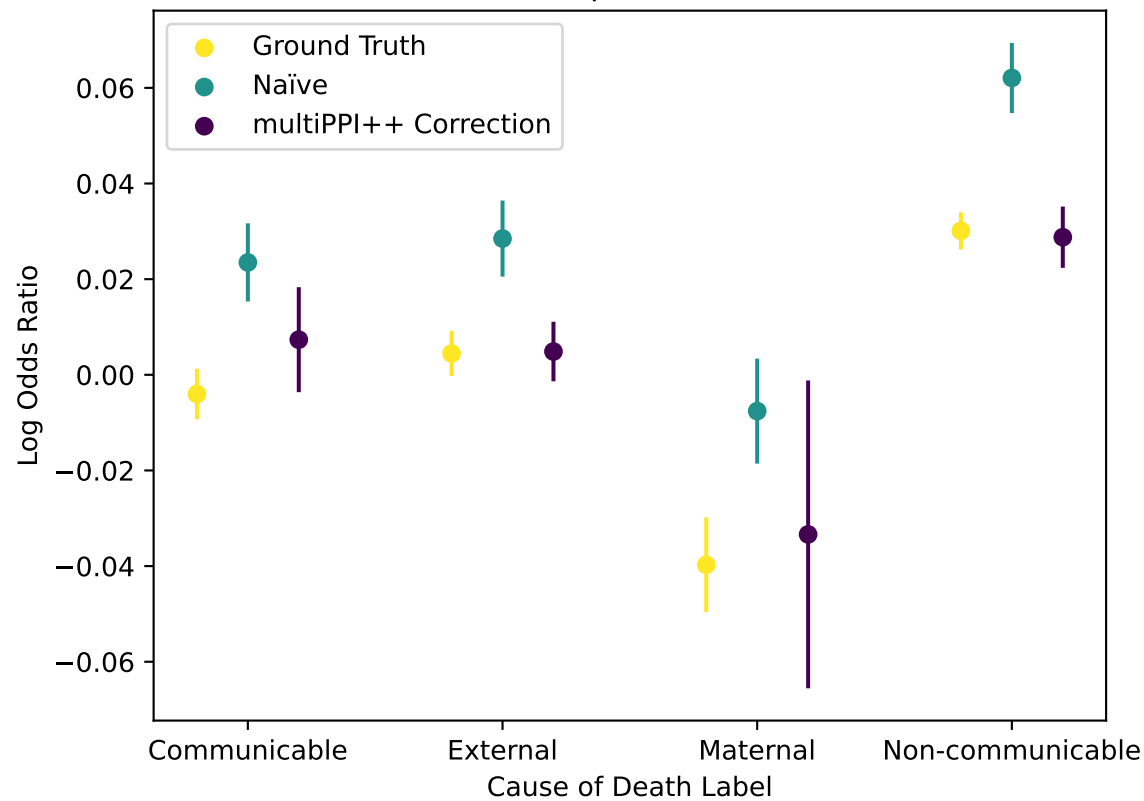

ap SVM

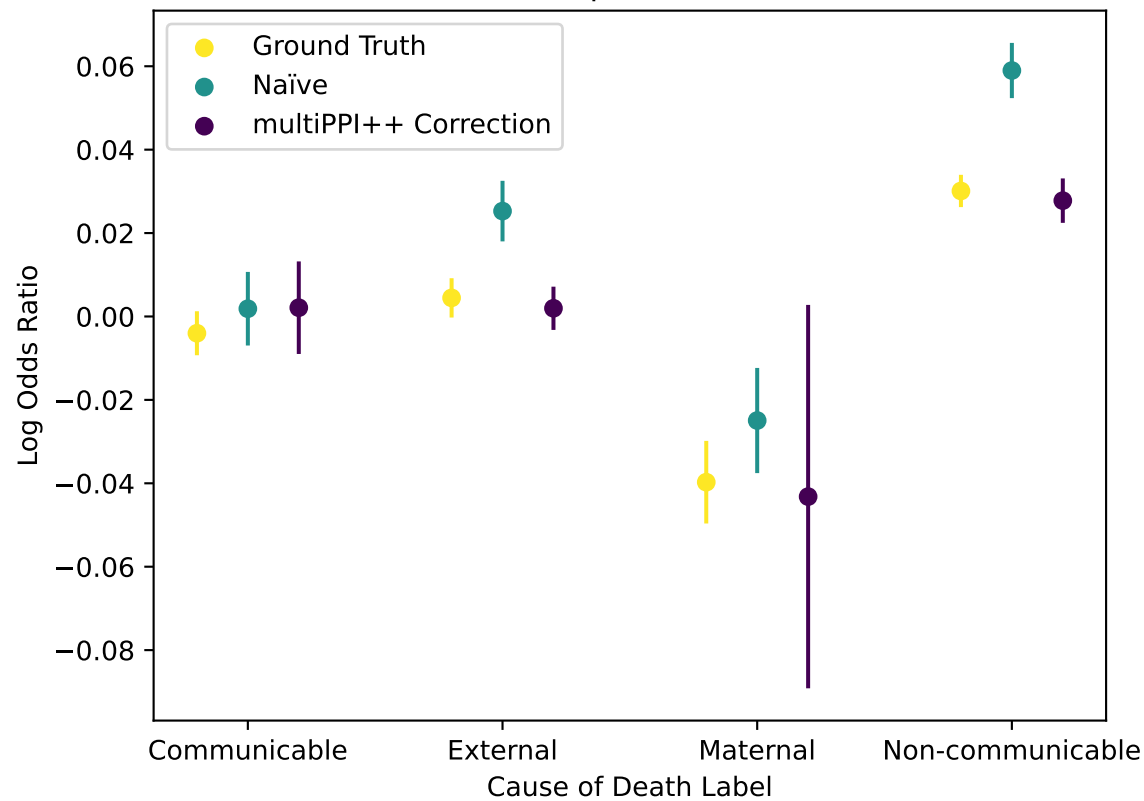

ap NB

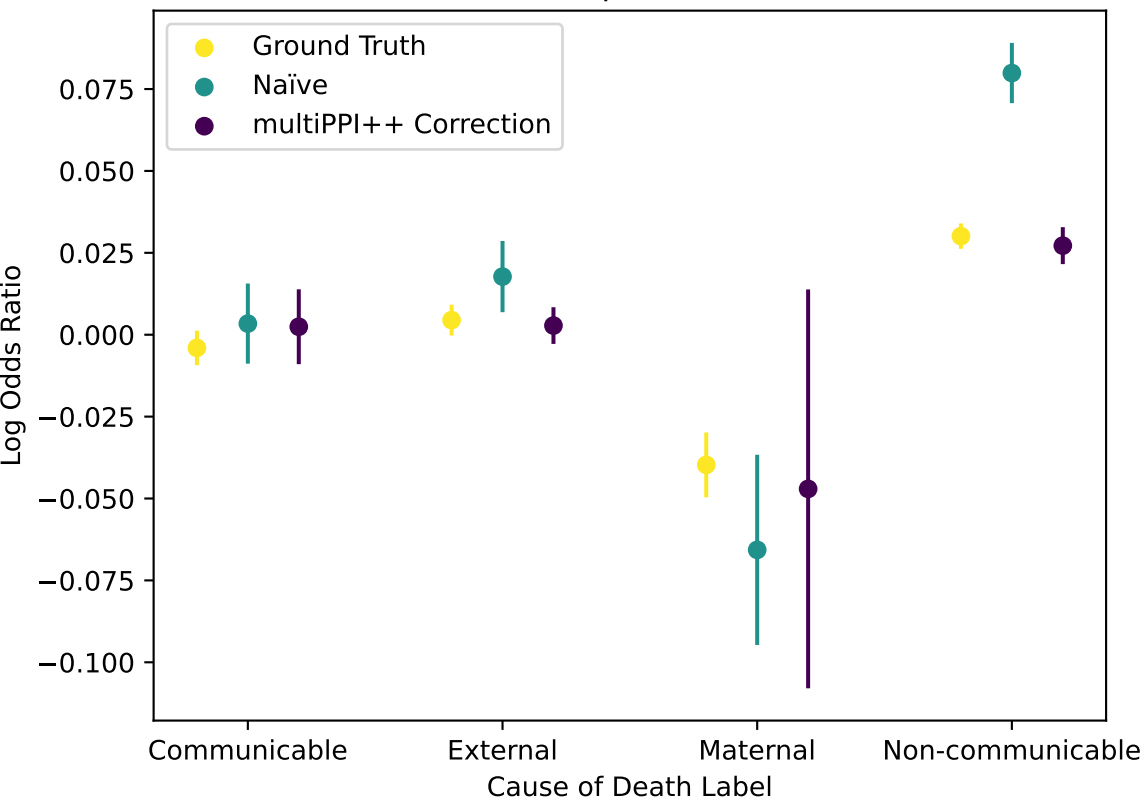

ap gpt4\_zs

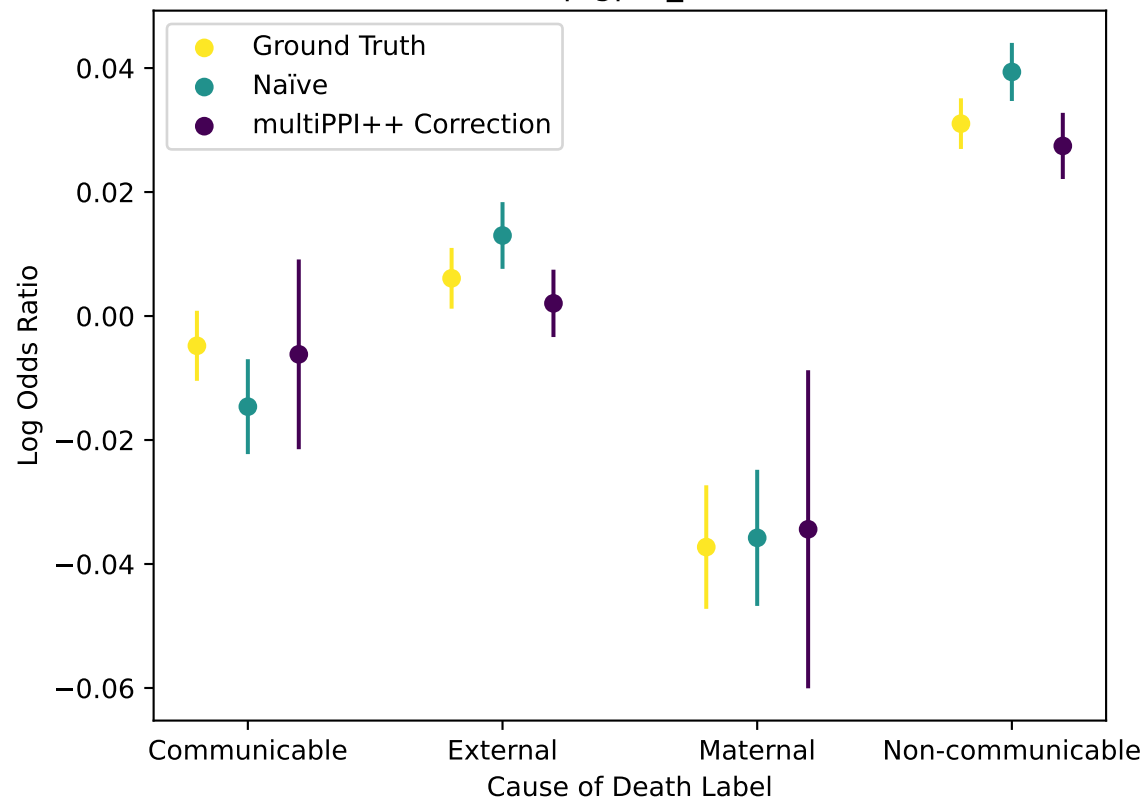



# up KNN

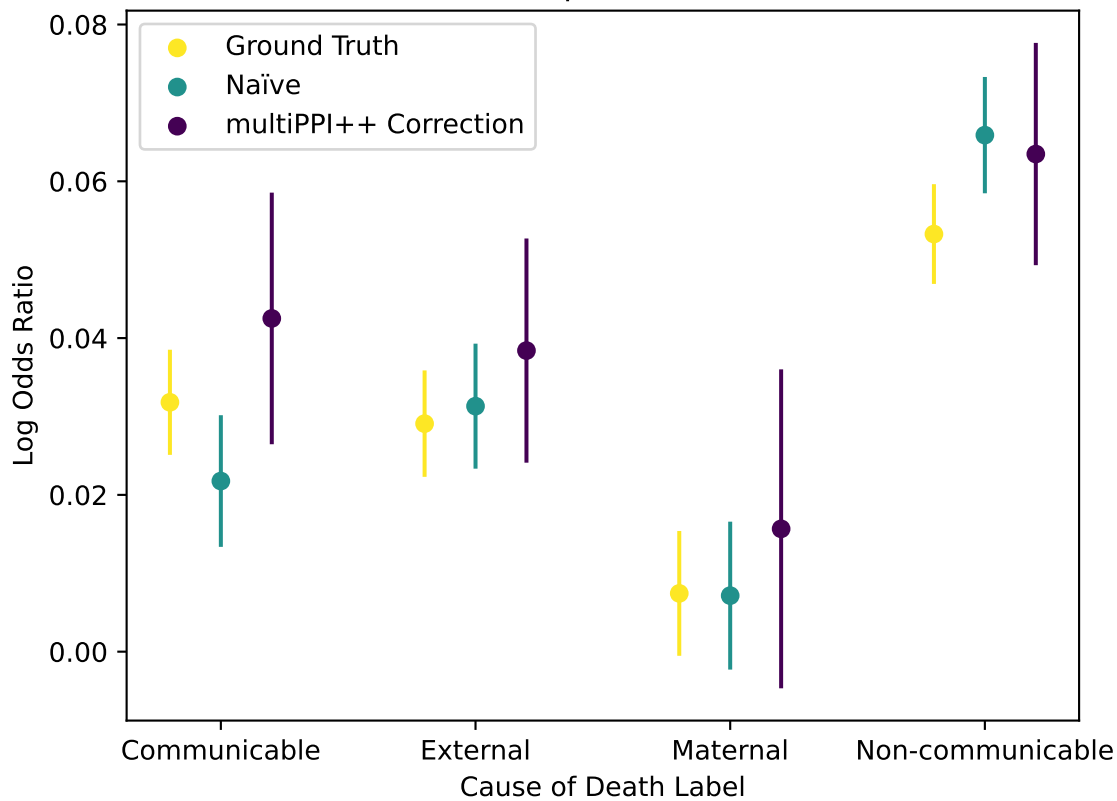

## up SVM

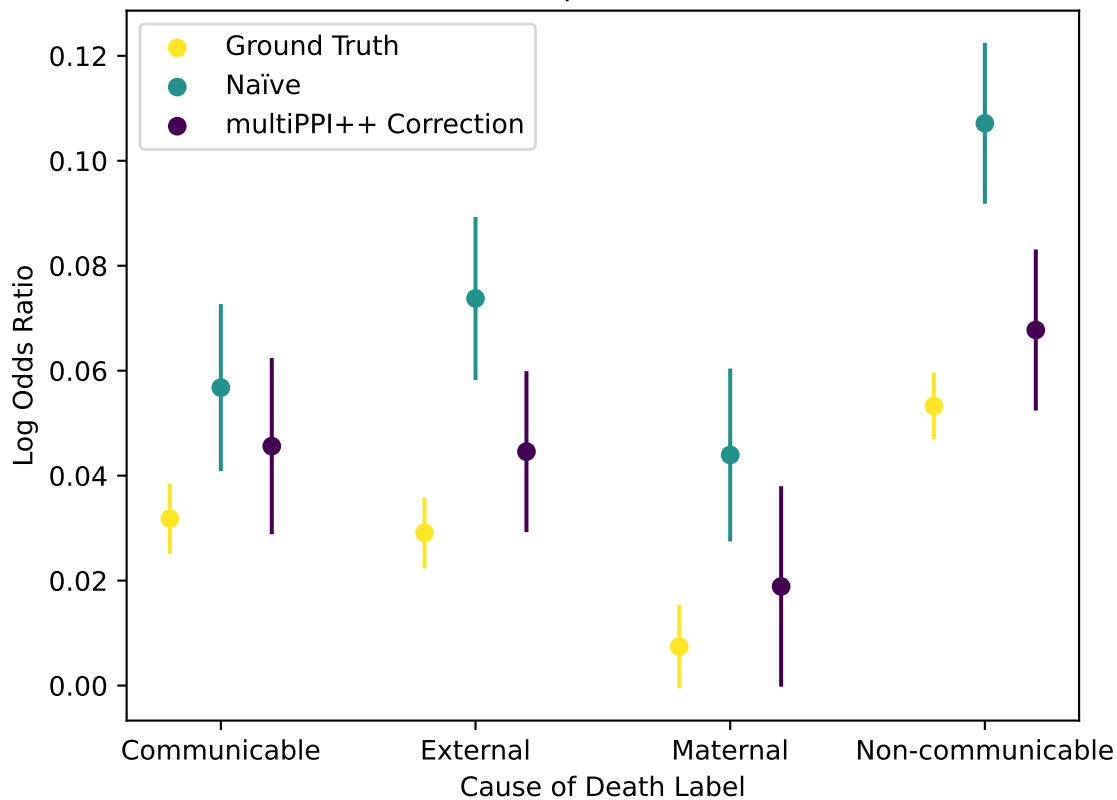

# up NB

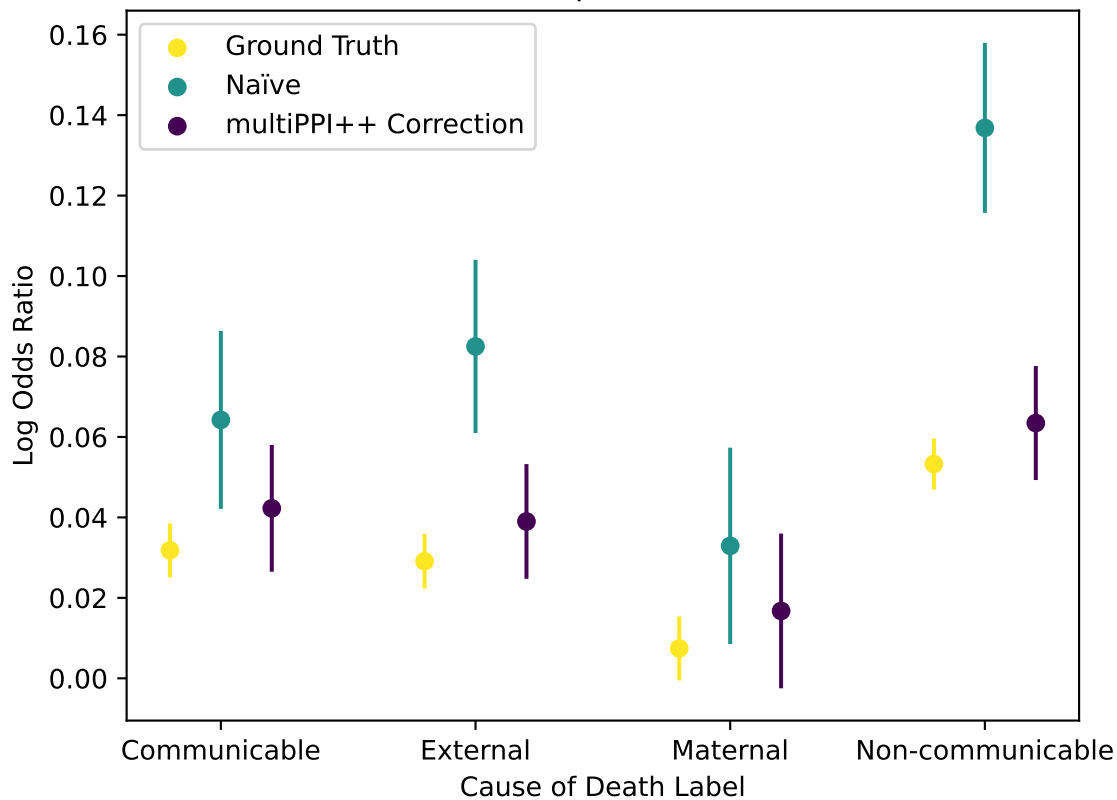

up gpt4\_zs

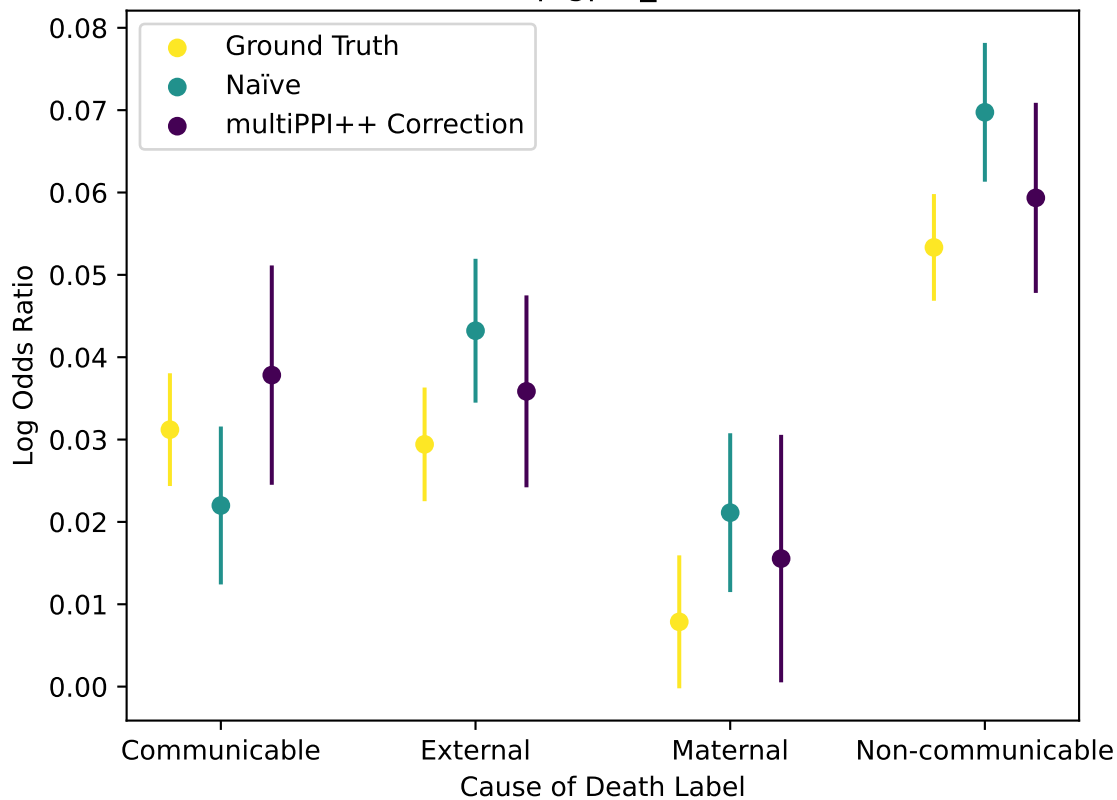

# dar KNN

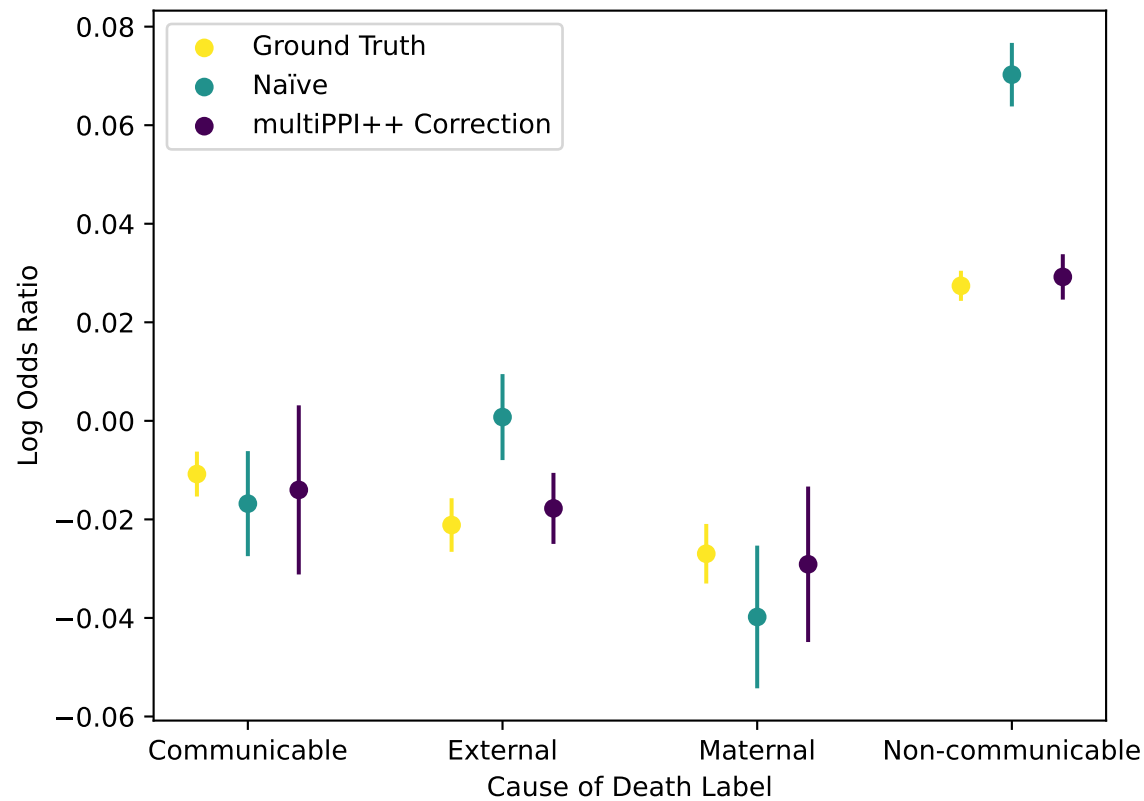

## dar SVM

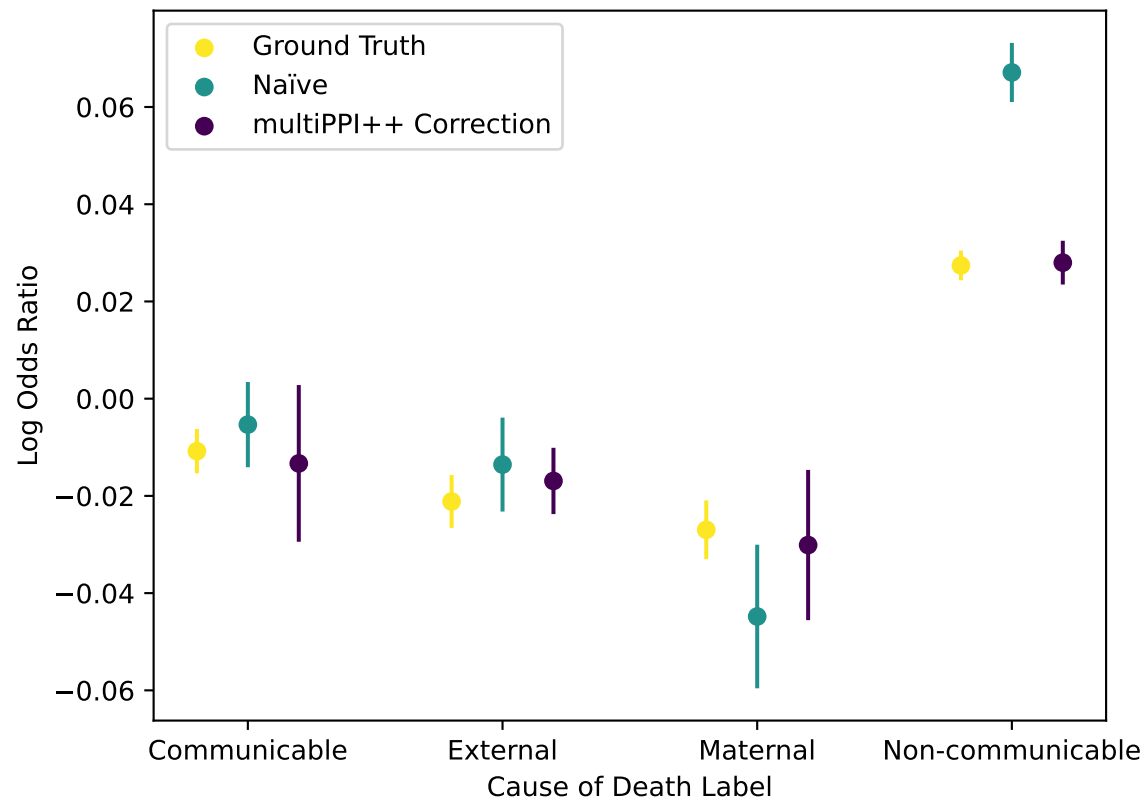

# dar NB

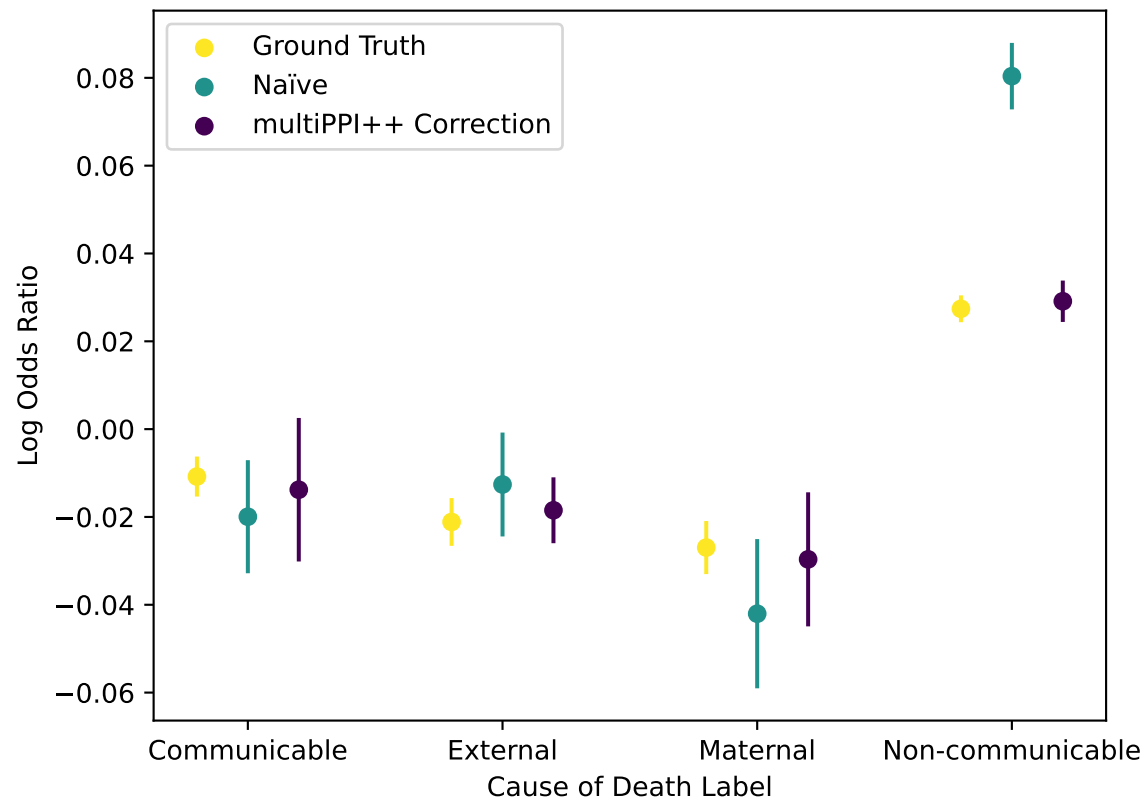

dar gpt4\_zs

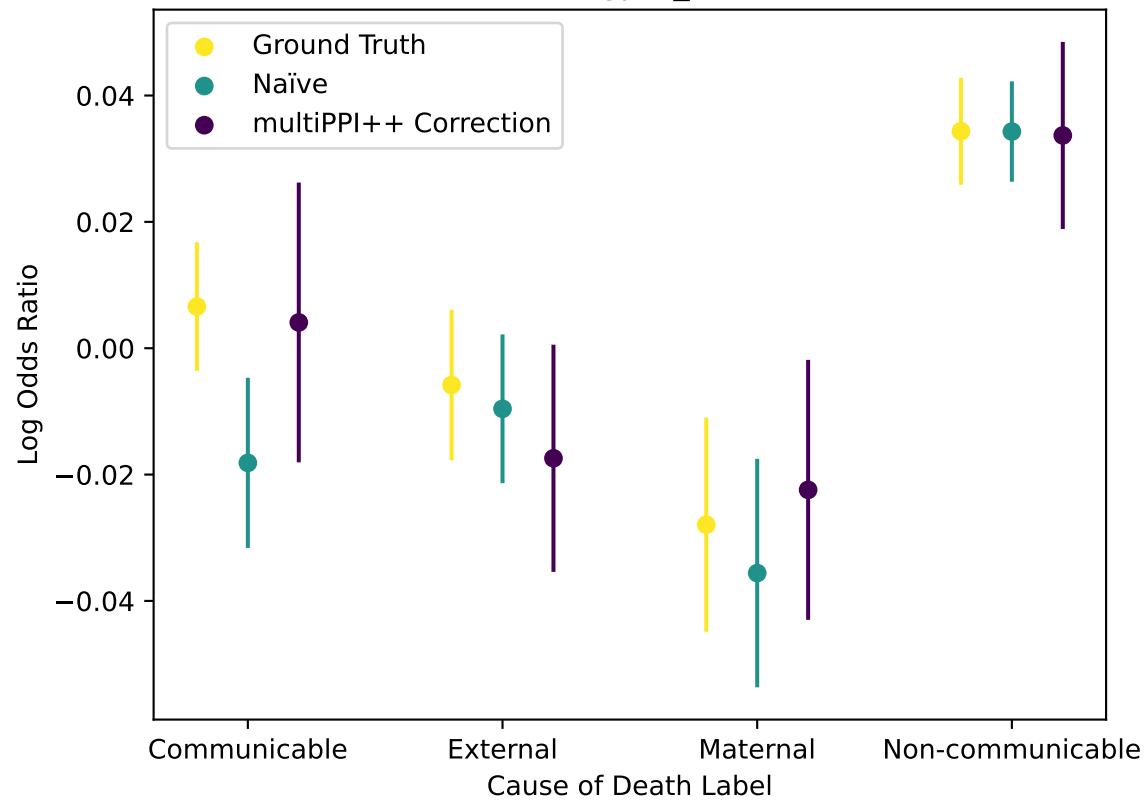



bohol KNN

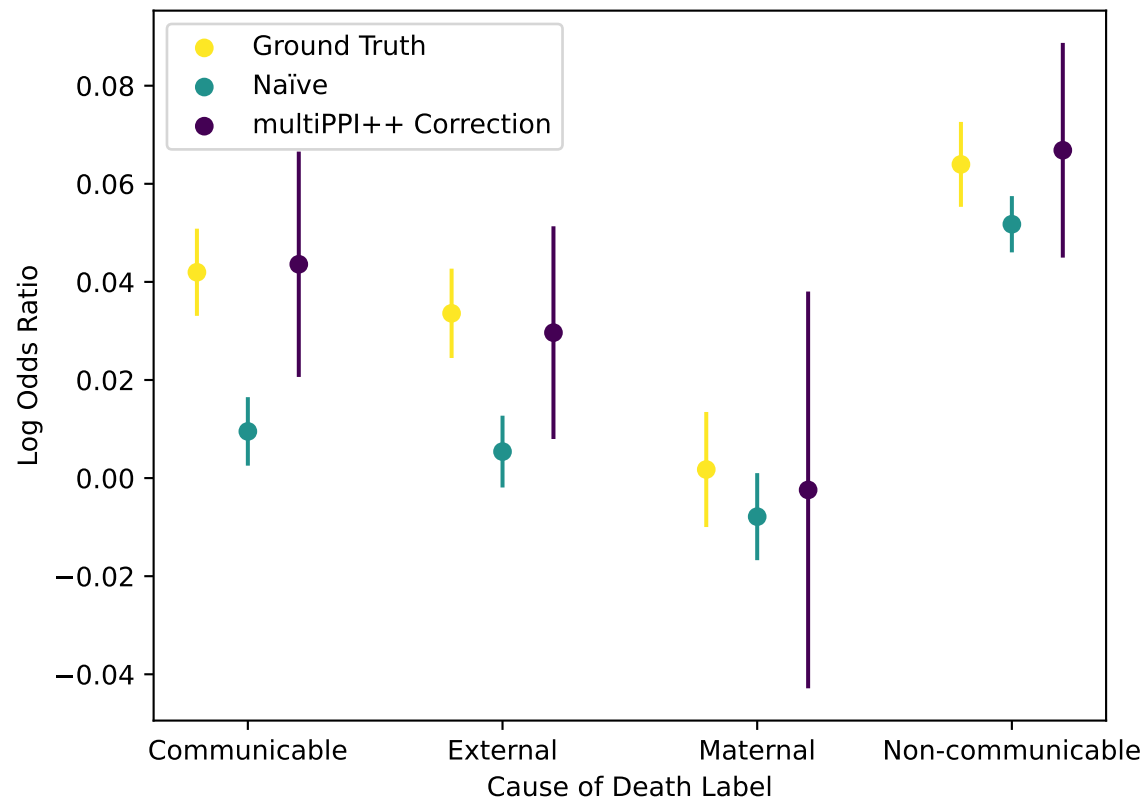

## bohol SVM

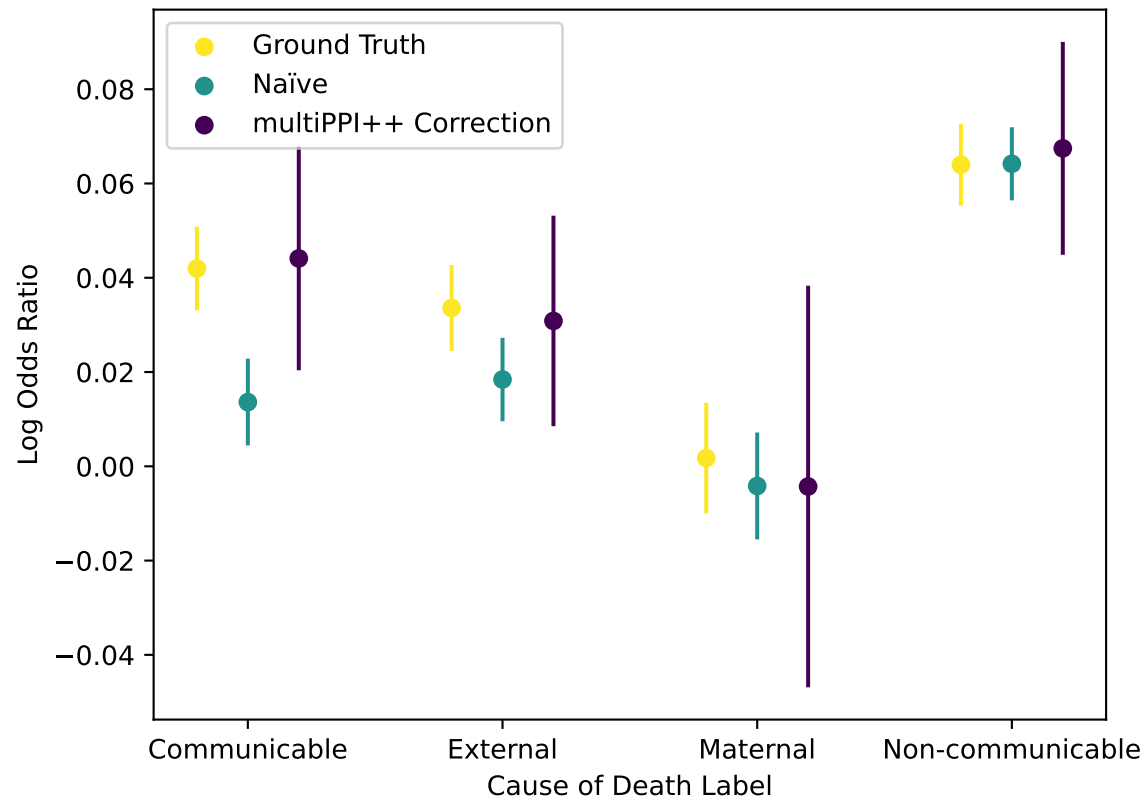

# bohol NB

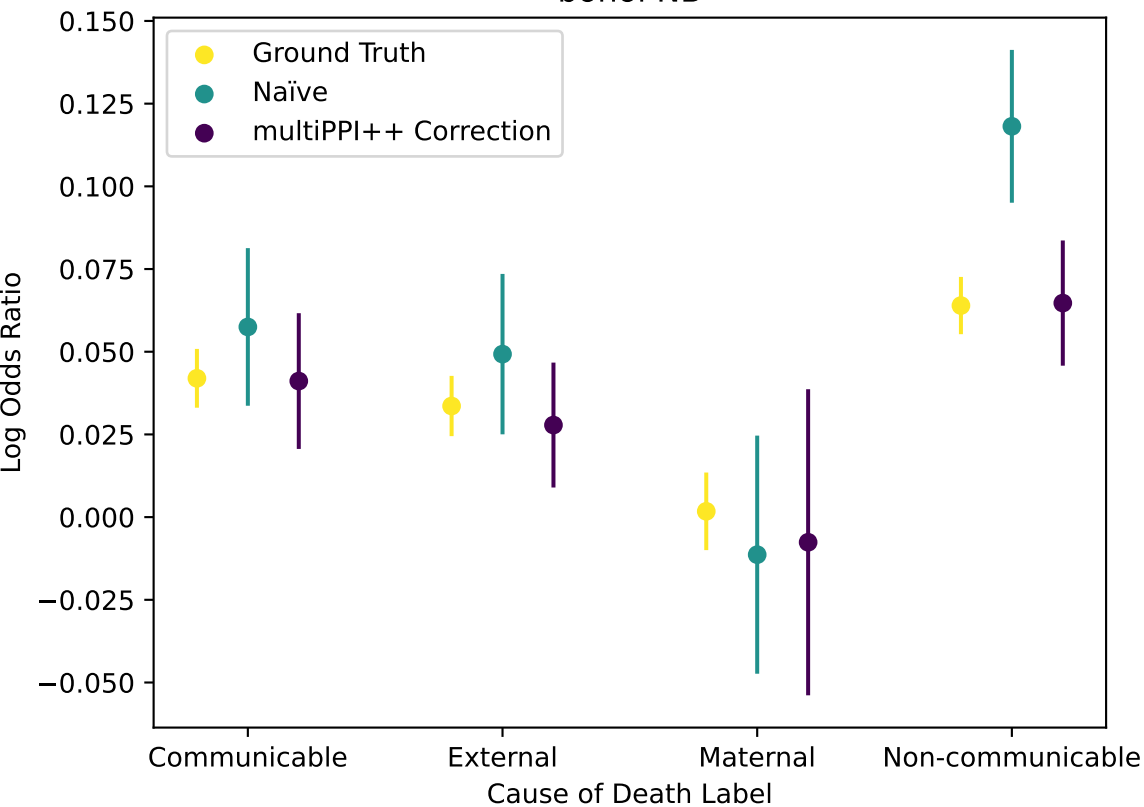

bohol gpt4\_zs

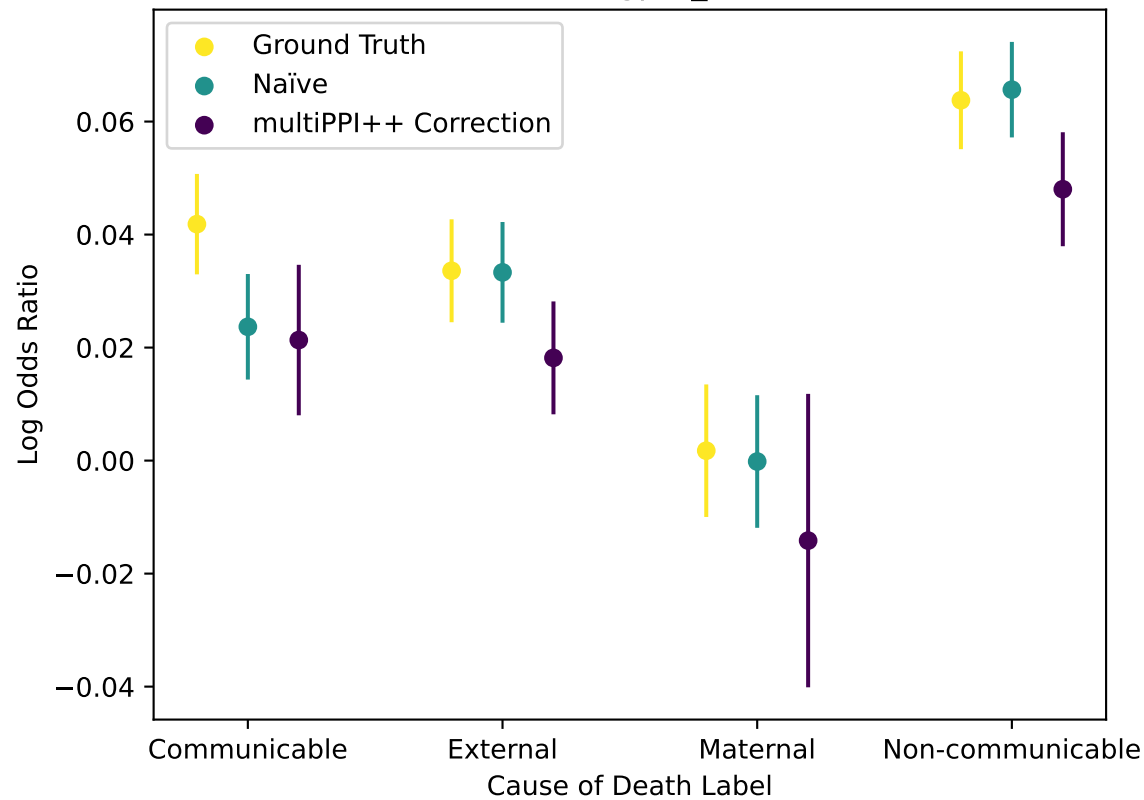

pemba gpt4\_zs

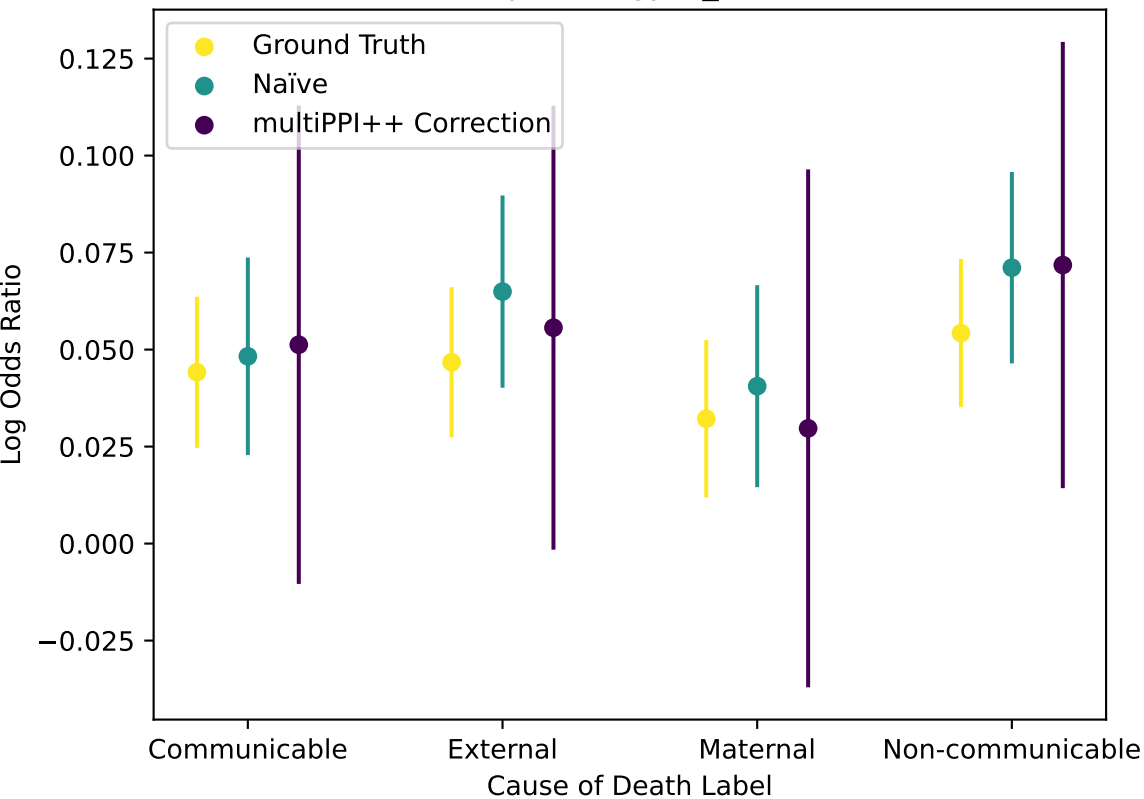

Supplement: supplementary_material [file attachment]
